# Supplementary material for: Structure and dynamics of 3′-aminoacetophenone and 4′-aminoacetophenone from rotational spectroscopy
Source: Royal Society of Chemistry journal article supplement (doi:10.1039/d3cp05608b), 2023-12-19
Supplement: d3cp05608b1.pdf [file d3cp05608b1.pdf]

# Structure and dynamics of 3'-aminoacetophenone and 4'-aminoacetophenone from rotational spectroscopy

Giovanna Salvitti, Silvia Sigismondi, Sonia Melandri,

Juan Carlos López, Susana Blanco, and Assimo Maris

December 20, 2023

## List of Figures

|    |                                                                                                          |   |
|----|----------------------------------------------------------------------------------------------------------|---|
| S1 | Measured (black) and simulated (red) CP-FTMW spectrum of 4'-aminoacetophenone. . . . .                   | 2 |
| S2 | Measured (black) and simulated (3AA-Z blue, 3AA-E red) CP-FTMW spectrum of 3'-aminoacetophenone. . . . . | 3 |

## List of Tables

|     |                                                                                                                                                |    |
|-----|------------------------------------------------------------------------------------------------------------------------------------------------|----|
| S1  | Experimental rotational transition frequencies of 4'-aminoacetophenone ( $\nu/\text{MHz}$ , $\Delta\nu = \nu_{obs} - \nu_{calc}$ ). . . . .    | 4  |
| S2  | Experimental rotational transition frequencies of 3'(Z)-aminoacetophenone ( $\nu/\text{MHz}$ , $\Delta\nu = \nu_{obs} - \nu_{calc}$ ). . . . . | 11 |
| S3  | Experimental rotational transition frequencies of 3'(E)-aminoacetophenone ( $\nu/\text{MHz}$ , $\Delta\nu = \nu_{obs} - \nu_{calc}$ ). . . . . | 18 |
| S4  | Experimental rotational transition frequencies of $^{13}\text{C1-4AA}$ . . . . .                                                               | 22 |
| S5  | Experimental rotational transition frequencies of $^{13}\text{C2-4AA}$ . . . . .                                                               | 22 |
| S6  | Experimental rotational transition frequencies of $^{13}\text{C3-4AA}$ . . . . .                                                               | 22 |
| S7  | Experimental rotational transition frequencies of $^{13}\text{C4-4AA}$ . . . . .                                                               | 23 |
| S8  | Experimental rotational transition frequencies of $^{13}\text{C5-4AA}$ . . . . .                                                               | 23 |
| S9  | Experimental rotational transition frequencies of $^{13}\text{C6-4AA}$ . . . . .                                                               | 23 |
| S10 | Experimental rotational transition frequencies of $^{13}\text{C7-4AA}$ . . . . .                                                               | 24 |
| S11 | Experimental rotational transition frequencies of $^{13}\text{C8-4AA}$ . . . . .                                                               | 24 |
| S12 | Experimental rotational transition frequencies of $^{15}\text{N-4AA}$ . . . . .                                                                | 24 |
| S13 | Experimental rotational transition frequencies of $^{13}\text{C1-3AA-Z}$ . . . . .                                                             | 25 |
| S14 | Experimental rotational transition frequencies of $^{13}\text{C2-3AA-Z}$ . . . . .                                                             | 25 |
| S15 | Experimental rotational transition frequencies of $^{13}\text{C3-3AA-Z}$ . . . . .                                                             | 26 |
| S16 | Experimental rotational transition frequencies of $^{13}\text{C4-3AA-Z}$ . . . . .                                                             | 26 |
| S17 | Experimental rotational transition frequencies of $^{13}\text{C5-3AA-Z}$ . . . . .                                                             | 27 |
| S18 | Experimental rotational transition frequencies of $^{13}\text{C6-3AA-Z}$ . . . . .                                                             | 27 |
| S19 | Experimental rotational transition frequencies of $^{13}\text{C7-3AA-Z}$ . . . . .                                                             | 28 |
| S20 | Experimental rotational transition frequencies of $^{13}\text{C8-3AA-Z}$ . . . . .                                                             | 28 |

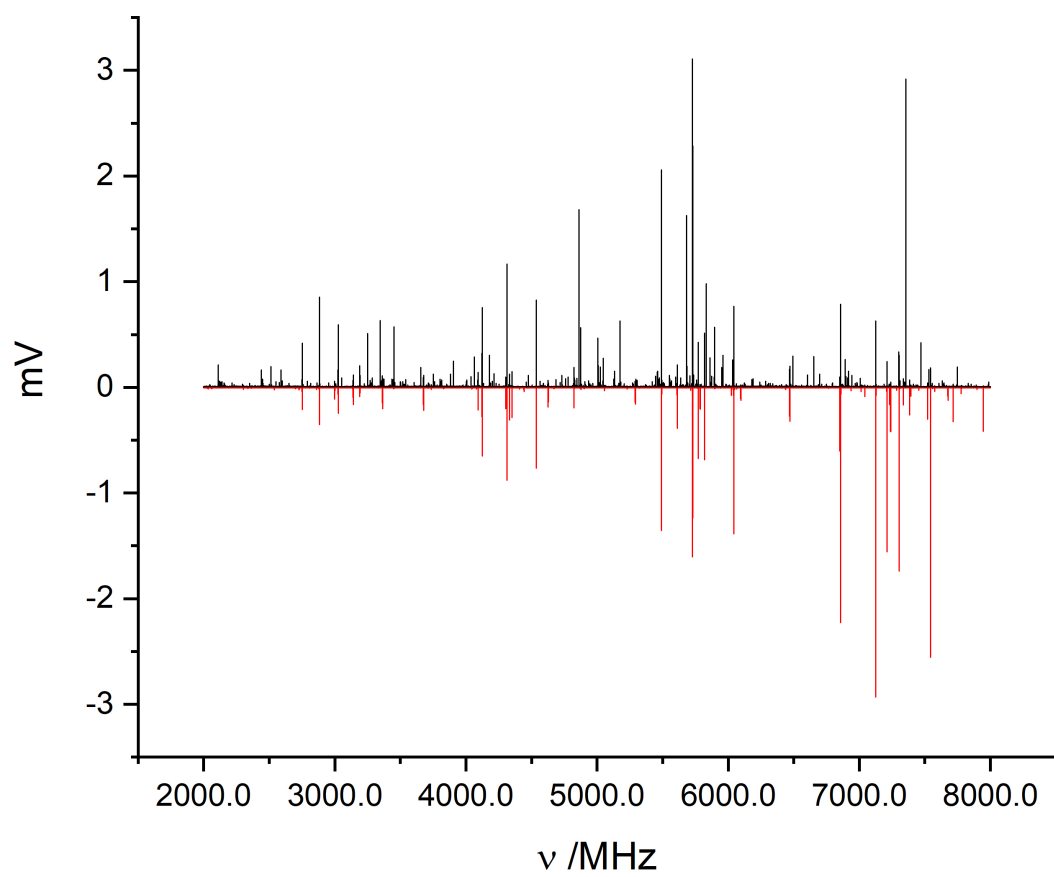

Figure S1: Measured (black) and simulated (red) CP-FTMW spectrum of 4'-aminoacetophenone.

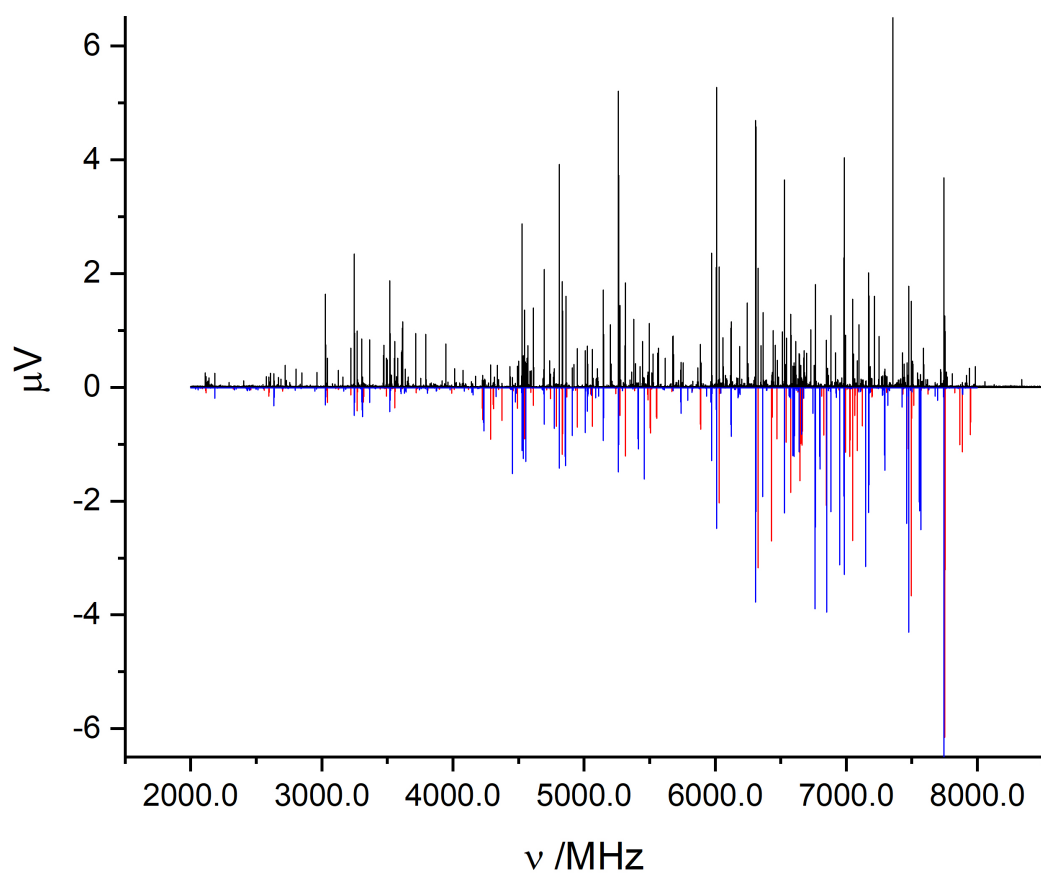

Figure S2: Measured (black) and simulated (3AA-Z blue, 3AA-E red) CP-FTMW spectrum of 3'-aminoacetophenone.

Table S1: Experimental rotational transition frequencies of 4'-aminoacetophenone ( $\nu$ /MHz,  $\Delta\nu = \nu_{obs} - \nu_{calc}$ ).

| $J'$ | $K'_a$ | $K'_c$ | $J''$ | $K''_a$ | $K''_c$ | $F'$ | $F''$ | Sym | $\nu_{obs}$ | $\Delta\nu_{XIAM}$ | $\Delta\nu_{SPFIT}$ |
|------|--------|--------|-------|---------|---------|------|-------|-----|-------------|--------------------|---------------------|
| 1    | 1      | 1      | 0     | 0       | 0       | 0    | 1     | E   | 4303.724    | 0.009              |                     |
| 1    | 1      | 1      | 0     | 0       | 0       | 0    | 1     | A   | 4303.724    | -0.013             | -0.008              |
| 1    | 1      | 1      | 0     | 0       | 0       | 2    | 1     | E   | 4304.569    | 0.016              |                     |
| 1    | 1      | 1      | 0     | 0       | 0       | 2    | 1     | A   | 4304.569    | -0.007             | -0.002              |
| 1    | 1      | 1      | 0     | 0       | 0       | 1    | 1     | E   | 4305.121    | 0.009              |                     |
| 1    | 1      | 1      | 0     | 0       | 0       | 1    | 1     | A   | 4305.121    | -0.014             | -0.009              |
| 1    | 1      | 0      | 1     | 0       | 1       | 1    | 1     | E   | 2996.376    | 0.002              |                     |
| 1    | 1      | 0      | 1     | 0       | 1       | 1    | 1     | A   | 2996.376    | -0.011             | -0.007              |
| 1    | 1      | 0      | 1     | 0       | 1       | 1    | 2     | E   | 2997.109    | 0.007              |                     |
| 1    | 1      | 0      | 1     | 0       | 1       | 1    | 2     | A   | 2997.109    | -0.005             | -0.001              |
| 1    | 1      | 0      | 1     | 0       | 1       | 2    | 1     | E   | 2997.665    | 0.004              |                     |
| 1    | 1      | 0      | 1     | 0       | 1       | 2    | 1     | A   | 2997.665    | -0.008             | -0.004              |
| 1    | 1      | 0      | 1     | 0       | 1       | 1    | 0     | E   | 2998.211    | 0.018              |                     |
| 1    | 1      | 0      | 1     | 0       | 1       | 1    | 0     | A   | 2998.211    | 0.006              | 0.011               |
| 1    | 1      | 0      | 1     | 0       | 1       | 2    | 2     | E   | 2998.390    | 0.002              |                     |
| 1    | 1      | 0      | 1     | 0       | 1       | 2    | 2     | A   | 2998.390    | -0.011             | -0.007              |
| 1    | 1      | 0      | 1     | 0       | 1       | 0    | 1     | E   | 2999.610    | 0.020              |                     |
| 1    | 1      | 0      | 1     | 0       | 1       | 0    | 1     | A   | 2999.610    | 0.007              | 0.010               |
| 2    | 0      | 2      | 1     | 0       | 1       | 1    | 1     | E   | 2882.198    | 0.004              |                     |
| 2    | 0      | 2      | 1     | 0       | 1       | 1    | 1     | A   | 2882.198    | 0.000              | 0.001               |
| 2    | 0      | 2      | 1     | 0       | 1       | 3    | 2     | E   | 2883.381    | 0.001              |                     |
| 2    | 0      | 2      | 1     | 0       | 1       | 3    | 2     | A   | 2883.381    | -0.003             | -0.002              |
| 2    | 0      | 2      | 1     | 0       | 1       | 2    | 1     | E   | 2883.479    | 0.002              |                     |
| 2    | 0      | 2      | 1     | 0       | 1       | 2    | 1     | A   | 2883.479    | -0.003             | -0.001              |
| 2    | 0      | 2      | 1     | 0       | 1       | 1    | 0     | E   | 2884.014    | 0.002              |                     |
| 2    | 0      | 2      | 1     | 0       | 1       | 1    | 0     | A   | 2884.014    | -0.003             | -0.001              |
| 2    | 0      | 2      | 1     | 0       | 1       | 2    | 2     | E   | 2884.205    | 0.000              |                     |
| 2    | 0      | 2      | 1     | 0       | 1       | 2    | 2     | A   | 2884.205    | -0.004             | -0.002              |
| 2    | 1      | 2      | 1     | 1       | 1       | 1    | 1     | E   | 2749.212    | 0.001              |                     |
| 2    | 1      | 2      | 1     | 1       | 1       | 1    | 1     | A   | 2749.212    | 0.002              | 0.003               |
| 2    | 1      | 2      | 1     | 1       | 1       | 3    | 2     | E   | 2750.533    | -0.003             |                     |
| 2    | 1      | 2      | 1     | 1       | 1       | 3    | 2     | A   | 2750.533    | -0.002             | 0.000               |
| 2    | 1      | 2      | 1     | 1       | 1       | 1    | 0     | E   | 2750.608    | -0.001             |                     |
| 2    | 1      | 2      | 1     | 1       | 1       | 1    | 0     | A   | 2750.608    | 0.000              | 0.001               |
| 2    | 1      | 2      | 1     | 1       | 1       | 2    | 1     | E   | 2751.358    | 0.003              |                     |
| 2    | 1      | 2      | 1     | 1       | 1       | 2    | 1     | A   | 2751.358    | 0.004              | 0.005               |
| 2    | 1      | 2      | 1     | 1       | 1       | 2    | 2     | E   | 2751.912    | -0.002             |                     |
| 2    | 1      | 2      | 1     | 1       | 1       | 2    | 2     | A   | 2751.912    | -0.001             | 0.000               |
| 2    | 1      | 1      | 1     | 1       | 0       | 1    | 0     | E   | 3024.149    | 0.010              |                     |
| 2    | 1      | 1      | 1     | 1       | 0       | 1    | 0     | A   | 3024.149    | 0.000              | 0.001               |
| 2    | 1      | 1      | 1     | 1       | 0       | 2    | 2     | E   | 3025.142    | 0.005              |                     |
| 2    | 1      | 1      | 1     | 1       | 0       | 2    | 2     | A   | 3025.142    | -0.005             | -0.003              |
| 2    | 1      | 1      | 1     | 1       | 0       | 3    | 2     | E   | 3025.741    | 0.005              |                     |
| 2    | 1      | 1      | 1     | 1       | 0       | 3    | 2     | A   | 3025.741    | -0.005             | -0.004              |
| 2    | 1      | 1      | 1     | 1       | 0       | 2    | 1     | E   | 3026.427    | 0.003              |                     |
| 2    | 1      | 1      | 1     | 1       | 0       | 2    | 1     | A   | 3026.427    | -0.007             | -0.005              |
| 2    | 1      | 1      | 1     | 1       | 0       | 1    | 1     | E   | 3027.363    | 0.008              |                     |
| 2    | 1      | 1      | 1     | 1       | 0       | 1    | 1     | A   | 3027.363    | -0.003             | -0.002              |
| 2    | 1      | 2      | 1     | 0       | 1       | 1    | 1     | E   | 5609.584    | 0.009              |                     |
| 2    | 1      | 2      | 1     | 0       | 1       | 1    | 1     | A   | 5609.584    | -0.011             | -0.006              |
| 2    | 1      | 2      | 1     | 0       | 1       | 3    | 2     | E   | 5611.080    | 0.011              |                     |
| 2    | 1      | 2      | 1     | 0       | 1       | 3    | 2     | A   | 5611.080    | -0.008             | -0.003              |
| 2    | 1      | 2      | 1     | 0       | 1       | 1    | 0     | E   | 5611.401    | 0.007              |                     |
| 2    | 1      | 2      | 1     | 0       | 1       | 1    | 0     | A   | 5611.401    | -0.012             | -0.006              |
| 2    | 1      | 2      | 1     | 0       | 1       | 2    | 1     | E   | 5611.730    | 0.010              |                     |
| 2    | 1      | 2      | 1     | 0       | 1       | 2    | 1     | A   | 5611.730    | -0.009             | -0.004              |

*Continued on next page*

Table S1 – *continued from previous page*

| $J'$ | $K'_a$ | $K'_c$ | $J''$ | $K''_a$ | $K''_c$ | $F'$ | $F''$ | Sym | $\nu_{obs}$ | $\Delta\nu_{XIAM}$ | $\Delta\nu_{SPFIT}$ |
|------|--------|--------|-------|---------|---------|------|-------|-----|-------------|--------------------|---------------------|
| 2    | 1      | 2      | 1     | 0       | 1       | 2    | 2     | E   | 5612.456    | 0.009              |                     |
| 2    | 1      | 2      | 1     | 0       | 1       | 2    | 2     | A   | 5612.456    | -0.011             | -0.005              |
| 2    | 1      | 1      | 2     | 0       | 2       | 2    | 2     | E   | 3139.336    | 0.016              |                     |
| 2    | 1      | 1      | 2     | 0       | 2       | 2    | 2     | A   | 3139.336    | -0.003             | 0.002               |
| 2    | 1      | 1      | 2     | 0       | 2       | 3    | 2     | E   | 3139.941    | 0.022              |                     |
| 2    | 1      | 1      | 2     | 0       | 2       | 3    | 2     | A   | 3139.941    | 0.003              | 0.007               |
| 2    | 1      | 1      | 2     | 0       | 2       | 2    | 3     | E   | 3140.160    | 0.015              |                     |
| 2    | 1      | 1      | 2     | 0       | 2       | 2    | 3     | A   | 3140.160    | -0.004             | 0.001               |
| 2    | 1      | 1      | 2     | 0       | 2       | 1    | 2     | E   | 3140.271    | 0.019              |                     |
| 2    | 1      | 1      | 2     | 0       | 2       | 1    | 2     | A   | 3140.271    | 0.000              | 0.003               |
| 2    | 1      | 1      | 2     | 0       | 2       | 2    | 1     | E   | 3140.615    | 0.011              |                     |
| 2    | 1      | 1      | 2     | 0       | 2       | 2    | 1     | A   | 3140.615    | -0.007             | -0.002              |
| 2    | 1      | 1      | 2     | 0       | 2       | 3    | 3     | E   | 3140.760    | 0.015              |                     |
| 2    | 1      | 1      | 2     | 0       | 2       | 3    | 3     | A   | 3140.760    | -0.003             | 0.001               |
| 2    | 1      | 1      | 2     | 0       | 2       | 1    | 1     | E   | 3141.557    | 0.021              |                     |
| 2    | 1      | 1      | 2     | 0       | 2       | 1    | 1     | A   | 3141.557    | 0.003              | 0.006               |
| 3    | 0      | 3      | 2     | 0       | 2       | 2    | 2     | E   | 4311.904    | 0.003              |                     |
| 3    | 0      | 3      | 2     | 0       | 2       | 2    | 2     | A   | 4311.904    | -0.003             | -0.002              |
| 3    | 0      | 3      | 2     | 0       | 2       | 4    | 3     | E   | 4313.052    | 0.002              |                     |
| 3    | 0      | 3      | 2     | 0       | 2       | 4    | 3     | A   | 4313.052    | -0.005             | -0.002              |
| 3    | 0      | 3      | 2     | 0       | 2       | 3    | 2     | E   | 4313.152    | 0.000              |                     |
| 3    | 0      | 3      | 2     | 0       | 2       | 3    | 2     | A   | 4313.152    | -0.006             | -0.004              |
| 3    | 0      | 3      | 2     | 0       | 2       | 2    | 1     | E   | 4313.183    | -0.002             |                     |
| 3    | 0      | 3      | 2     | 0       | 2       | 2    | 1     | A   | 4313.183    | -0.008             | -0.005              |
| 3    | 0      | 3      | 2     | 0       | 2       | 3    | 3     | E   | 4313.979    | 0.002              |                     |
| 3    | 0      | 3      | 2     | 0       | 2       | 3    | 3     | A   | 4313.979    | -0.004             | -0.002              |
| 3    | 1      | 3      | 2     | 1       | 2       | 2    | 2     | E   | 4121.076    | -0.008             |                     |
| 3    | 1      | 3      | 2     | 1       | 2       | 2    | 2     | A   | 4121.076    | -0.011             | -0.009              |
| 3    | 1      | 3      | 2     | 1       | 2       | 4    | 3     | E   | 4123.037    | -0.002             |                     |
| 3    | 1      | 3      | 2     | 1       | 2       | 4    | 3     | A   | 4123.037    | -0.005             | -0.003              |
| 3    | 1      | 3      | 2     | 1       | 2       | 2    | 1     | E   | 4123.226    | -0.003             |                     |
| 3    | 1      | 3      | 2     | 1       | 2       | 2    | 1     | A   | 4123.226    | -0.005             | -0.003              |
| 3    | 1      | 3      | 2     | 1       | 2       | 3    | 2     | E   | 4123.304    | -0.003             |                     |
| 3    | 1      | 3      | 2     | 1       | 2       | 3    | 2     | A   | 4123.304    | -0.005             | -0.003              |
| 3    | 1      | 3      | 2     | 1       | 2       | 3    | 3     | E   | 4124.684    | -0.001             |                     |
| 3    | 1      | 3      | 2     | 1       | 2       | 3    | 3     | A   | 4124.684    | -0.004             | -0.002              |
| 3    | 1      | 2      | 2     | 1       | 1       | 3    | 3     | E   | 4535.221    | 0.008              |                     |
| 3    | 1      | 2      | 2     | 1       | 1       | 3    | 3     | A   | 4535.221    | -0.003             | 0.000               |
| 3    | 1      | 2      | 2     | 1       | 1       | 2    | 1     | E   | 4535.435    | 0.010              |                     |
| 3    | 1      | 2      | 2     | 1       | 1       | 2    | 1     | A   | 4535.435    | -0.001             | 0.002               |
| 3    | 1      | 2      | 2     | 1       | 1       | 4    | 3     | E   | 4535.624    | 0.007              |                     |
| 3    | 1      | 2      | 2     | 1       | 1       | 4    | 3     | A   | 4535.624    | -0.004             | -0.001              |
| 3    | 1      | 2      | 2     | 1       | 1       | 3    | 2     | E   | 4535.819    | 0.007              |                     |
| 3    | 1      | 2      | 2     | 1       | 1       | 3    | 2     | A   | 4535.819    | -0.004             | -0.001              |
| 3    | 1      | 2      | 2     | 1       | 1       | 2    | 2     | E   | 4536.366    | 0.009              | -0.001              |
| 3    | 2      | 2      | 2     | 2       | 1       | 2    | 1     | A   | 4331.825    | 0.000              | 0.002               |
| 3    | 2      | 2      | 2     | 2       | 1       | 4    | 3     | E   | 4332.649    | -0.001             |                     |
| 3    | 2      | 2      | 2     | 2       | 1       | 4    | 3     | A   | 4332.252    | -0.006             | -0.004              |
| 3    | 2      | 2      | 2     | 2       | 1       | 3    | 2     | E   | 4333.427    | -0.006             |                     |
| 3    | 2      | 2      | 2     | 2       | 1       | 3    | 2     | A   | 4333.037    | 0.000              | 0.002               |
| 3    | 2      | 1      | 2     | 2       | 0       | 2    | 1     | E   | 4350.777    | -0.004             |                     |
| 3    | 2      | 1      | 2     | 2       | 0       | 2    | 1     | A   | 4351.186    | 0.000              | 0.002               |
| 3    | 2      | 1      | 2     | 2       | 0       | 3    | 3     | A   | 4351.478    | -0.007             | -0.005              |
| 3    | 2      | 1      | 2     | 2       | 0       | 4    | 3     | E   | 4351.186    | -0.011             |                     |
| 3    | 2      | 1      | 2     | 2       | 0       | 4    | 3     | A   | 4351.600    | -0.003             | -0.001              |
| 3    | 2      | 1      | 2     | 2       | 0       | 3    | 2     | E   | 4351.892    | -0.008             |                     |
| 3    | 2      | 1      | 2     | 2       | 0       | 3    | 2     | A   | 4352.306    | -0.004             | -0.002              |

*Continued on next page*

Table S1 – *continued from previous page*

| $J'$ | $K'_a$ | $K'_c$ | $J''$ | $K''_a$ | $K''_c$ | $F'$ | $F''$ | Sym | $\nu_{obs}$ | $\Delta\nu_{XIAM}$ | $\Delta\nu_{SPFIT}$ |
|------|--------|--------|-------|---------|---------|------|-------|-----|-------------|--------------------|---------------------|
| 3    | 2      | 1      | 2     | 2       | 0       | 2    | 2     | A   | 4352.463    | -0.007             | -0.004              |
| 3    | 1      | 3      | 2     | 0       | 2       | 2    | 1     | E   | 6850.613    | 0.003              |                     |
| 3    | 1      | 3      | 2     | 0       | 2       | 2    | 1     | A   | 6850.613    | -0.015             | -0.009              |
| 3    | 1      | 3      | 2     | 0       | 2       | 4    | 3     | E   | 6850.738    | 0.010              |                     |
| 3    | 1      | 3      | 2     | 0       | 2       | 4    | 3     | A   | 6850.738    | -0.007             | -0.002              |
| 3    | 1      | 3      | 2     | 0       | 2       | 3    | 2     | E   | 6851.555    | 0.006              |                     |
| 3    | 1      | 3      | 2     | 0       | 2       | 3    | 2     | A   | 6851.555    | -0.011             | -0.006              |
| 3    | 1      | 3      | 2     | 0       | 2       | 3    | 3     | E   | 6852.378    | 0.004              |                     |
| 3    | 1      | 3      | 2     | 0       | 2       | 3    | 3     | A   | 6852.378    | -0.013             | -0.008              |
| 3    | 1      | 2      | 3     | 0       | 3       | 3    | 3     | E   | 3362.002    | 0.021              |                     |
| 3    | 1      | 2      | 3     | 0       | 3       | 3    | 3     | A   | 3362.002    | -0.002             | 0.003               |
| 3    | 1      | 2      | 3     | 0       | 3       | 3    | 4     | E   | 3362.922    | 0.015              |                     |
| 3    | 1      | 2      | 3     | 0       | 3       | 3    | 4     | A   | 3362.922    | -0.008             | -0.003              |
| 3    | 1      | 2      | 3     | 0       | 3       | 4    | 4     | E   | 3363.330    | 0.019              |                     |
| 3    | 1      | 2      | 3     | 0       | 3       | 4    | 4     | A   | 3363.330    | -0.004             | 0.001               |
| 3    | 1      | 2      | 3     | 0       | 3       | 2    | 2     | E   | 3363.801    | 0.024              |                     |
| 3    | 1      | 2      | 3     | 0       | 3       | 2    | 2     | A   | 3363.801    | 0.001              | 0.006               |
| 4    | 0      | 4      | 3     | 0       | 3       | 3    | 3     | E   | 5727.270    | 0.002              |                     |
| 4    | 0      | 4      | 3     | 0       | 3       | 3    | 3     | A   | 5727.270    | -0.006             | -0.003              |
| 4    | 0      | 4      | 3     | 0       | 3       | 5    | 4     | E   | 5728.466    | 0.004              |                     |
| 4    | 0      | 4      | 3     | 0       | 3       | 5    | 4     | A   | 5728.466    | -0.004             | -0.002              |
| 4    | 0      | 4      | 3     | 0       | 3       | 3    | 2     | E   | 5728.520    | 0.002              |                     |
| 4    | 0      | 4      | 3     | 0       | 3       | 3    | 2     | A   | 5728.520    | -0.006             | -0.004              |
| 4    | 0      | 4      | 3     | 0       | 3       | 4    | 3     | E   | 5728.578    | 0.000              |                     |
| 4    | 0      | 4      | 3     | 0       | 3       | 4    | 3     | A   | 5728.578    | -0.008             | -0.006              |
| 4    | 0      | 4      | 3     | 0       | 3       | 4    | 4     | E   | 5729.506    | 0.001              |                     |
| 4    | 0      | 4      | 3     | 0       | 3       | 4    | 4     | A   | 5729.506    | -0.007             | -0.004              |
| 4    | 1      | 4      | 3     | 1       | 3       | 3    | 3     | E   | 5489.946    | -0.002             |                     |
| 4    | 1      | 4      | 3     | 1       | 3       | 3    | 3     | A   | 5489.946    | -0.006             | -0.003              |
| 4    | 1      | 4      | 3     | 1       | 3       | 5    | 4     | E   | 5492.051    | -0.002             |                     |
| 4    | 1      | 4      | 3     | 1       | 3       | 5    | 4     | A   | 5492.051    | -0.006             | -0.004              |
| 4    | 1      | 4      | 3     | 1       | 3       | 3    | 2     | E   | 5492.148    | -0.022             |                     |
| 4    | 1      | 4      | 3     | 1       | 3       | 3    | 2     | A   | 5492.148    | -0.026             | -0.023              |
| 4    | 1      | 4      | 3     | 1       | 3       | 4    | 3     | E   | 5492.204    | 0.009              |                     |
| 4    | 1      | 4      | 3     | 1       | 3       | 4    | 3     | A   | 5492.204    | 0.005              | 0.007               |
| 4    | 1      | 4      | 3     | 1       | 3       | 4    | 4     | E   | 5493.838    | -0.003             |                     |
| 4    | 1      | 4      | 3     | 1       | 3       | 4    | 4     | A   | 5493.838    | -0.007             | -0.005              |
| 4    | 1      | 3      | 3     | 1       | 2       | 4    | 4     | E   | 6041.315    | 0.011              |                     |
| 4    | 1      | 3      | 3     | 1       | 2       | 4    | 4     | A   | 6041.315    | -0.003             | 0.001               |
| 4    | 1      | 3      | 3     | 1       | 2       | 3    | 2     | E   | 6041.552    | 0.005              |                     |
| 4    | 1      | 3      | 3     | 1       | 2       | 3    | 2     | A   | 6041.552    | -0.009             | -0.006              |
| 4    | 1      | 3      | 3     | 1       | 2       | 5    | 4     | E   | 6041.623    | 0.013              |                     |
| 4    | 1      | 3      | 3     | 1       | 2       | 5    | 4     | A   | 6041.623    | -0.001             | 0.003               |
| 4    | 1      | 3      | 3     | 1       | 2       | 4    | 3     | E   | 6041.716    | 0.008              |                     |
| 4    | 1      | 3      | 3     | 1       | 2       | 4    | 3     | A   | 6041.716    | -0.006             | -0.002              |
| 4    | 1      | 3      | 3     | 1       | 2       | 3    | 3     | E   | 6042.101    | 0.008              |                     |
| 4    | 1      | 3      | 3     | 1       | 2       | 3    | 3     | A   | 6042.101    | -0.006             | -0.003              |
| 4    | 2      | 3      | 3     | 2       | 2       | 3    | 2     | A   | 5772.628    | 0.001              | 0.003               |
| 4    | 2      | 3      | 3     | 2       | 2       | 5    | 4     | E   | 5772.771    | -0.010             |                     |
| 4    | 2      | 3      | 3     | 2       | 2       | 5    | 4     | A   | 5772.720    | 0.005              | 0.007               |
| 4    | 2      | 3      | 3     | 2       | 2       | 4    | 3     | E   | 5773.113    | -0.011             |                     |
| 4    | 2      | 3      | 3     | 2       | 2       | 4    | 3     | A   | 5773.057    | 0.000              | 0.003               |
| 4    | 2      | 2      | 3     | 2       | 1       | 3    | 2     | E   | 5820.633    | -0.006             |                     |
| 4    | 2      | 2      | 3     | 2       | 1       | 3    | 2     | A   | 5820.722    | -0.002             | 0.001               |
| 4    | 2      | 2      | 3     | 2       | 1       | 5    | 4     | A   | 5820.798    | 0.000              | 0.003               |
| 4    | 2      | 2      | 3     | 2       | 1       | 4    | 3     | E   | 5820.954    | -0.003             |                     |
| 4    | 2      | 2      | 3     | 2       | 1       | 4    | 3     | A   | 5821.041    | -0.001             | 0.002               |

*Continued on next page*

Table S1 – *continued from previous page*

| $J'$ | $K'_a$ | $K'_c$ | $J''$ | $K''_a$ | $K''_c$ | $F'$ | $F''$ | Sym | $\nu_{obs}$ | $\Delta\nu_{XIAM}$ | $\Delta\nu_{SPFIT}$ |
|------|--------|--------|-------|---------|---------|------|-------|-----|-------------|--------------------|---------------------|
| 4    | 3      | 2      | 3     | 3       | 1       | 3    | 2     | A   | 5785.494    | -0.006             | -0.003              |
| 4    | 3      | 2      | 3     | 3       | 1       | 5    | 4     | A   | 5785.826    | 0.051              | 0.054               |
| 4    | 3      | 2      | 3     | 3       | 1       | 4    | 3     | A   | 5786.472    | -0.002             | 0.001               |
| 4    | 3      | 1      | 3     | 3       | 0       | 3    | 2     | A   | 5786.140    | 0.000              | 0.002               |
| 4    | 3      | 1      | 3     | 3       | 0       | 5    | 4     | A   | 5786.421    | 0.006              | 0.009               |
| 4    | 3      | 1      | 3     | 3       | 0       | 4    | 3     | A   | 5787.095    | -0.016             | -0.013              |
| 4    | 0      | 4      | 3     | 1       | 3       | 4    | 3     | E   | 3190.181    | 0.000              |                     |
| 4    | 0      | 4      | 3     | 1       | 3       | 4    | 3     | A   | 3190.181    | 0.003              | 0.003               |
| 4    | 0      | 4      | 3     | 1       | 3       | 5    | 4     | E   | 3190.785    | 0.000              |                     |
| 4    | 0      | 4      | 3     | 1       | 3       | 5    | 4     | A   | 3190.785    | 0.003              | 0.003               |
| 4    | 0      | 4      | 3     | 1       | 3       | 3    | 2     | E   | 3191.096    | 0.003              |                     |
| 4    | 0      | 4      | 3     | 1       | 3       | 3    | 2     | A   | 3191.096    | 0.006              | 0.006               |
| 4    | 0      | 4      | 3     | 1       | 3       | 4    | 4     | E   | 3191.823    | -0.004             |                     |
| 4    | 0      | 4      | 3     | 1       | 3       | 4    | 4     | A   | 3191.823    | -0.001             | -0.002              |
| 4    | 1      | 3      | 4     | 0       | 4       | 4    | 4     | E   | 3675.136    | 0.026              |                     |
| 4    | 1      | 3      | 4     | 0       | 4       | 4    | 4     | A   | 3675.136    | -0.003             | 0.003               |
| 4    | 1      | 3      | 4     | 0       | 4       | 5    | 5     | E   | 3676.484    | 0.025              |                     |
| 4    | 1      | 3      | 4     | 0       | 4       | 5    | 5     | A   | 3676.484    | -0.004             | 0.002               |
| 4    | 1      | 3      | 4     | 0       | 4       | 3    | 3     | E   | 3676.835    | 0.030              |                     |
| 4    | 1      | 3      | 4     | 0       | 4       | 3    | 3     | A   | 3676.835    | 0.001              | 0.006               |
| 5    | 0      | 5      | 4     | 0       | 4       | 4    | 4     | E   | 7124.315    | 0.004              |                     |
| 5    | 0      | 5      | 4     | 0       | 4       | 4    | 4     | A   | 7124.315    | -0.005             | -0.003              |
| 5    | 0      | 5      | 4     | 0       | 4       | 6    | 5     | E   | 7125.587    | -0.006             |                     |
| 5    | 0      | 5      | 4     | 0       | 4       | 6    | 5     | A   | 7125.587    | -0.015             | -0.012              |
| 5    | 0      | 5      | 4     | 0       | 4       | 4    | 3     | E   | 7125.641    | 0.019              |                     |
| 5    | 0      | 5      | 4     | 0       | 4       | 4    | 3     | A   | 7125.641    | 0.010              | 0.013               |
| 5    | 0      | 5      | 4     | 0       | 4       | 5    | 4     | E   | 7125.729    | 0.003              |                     |
| 5    | 0      | 5      | 4     | 0       | 4       | 5    | 4     | A   | 7125.729    | -0.006             | -0.003              |
| 5    | 0      | 5      | 4     | 0       | 4       | 5    | 5     | E   | 7126.771    | 0.002              |                     |
| 5    | 0      | 5      | 4     | 0       | 4       | 5    | 5     | A   | 7126.771    | -0.007             | -0.004              |
| 5    | 1      | 5      | 4     | 1       | 4       | 4    | 4     | E   | 6854.548    | -0.003             |                     |
| 5    | 1      | 5      | 4     | 1       | 4       | 4    | 4     | A   | 6854.548    | -0.008             | -0.005              |
| 5    | 1      | 5      | 4     | 1       | 4       | 6    | 5     | E   | 6856.719    | -0.004             |                     |
| 5    | 1      | 5      | 4     | 1       | 4       | 6    | 5     | A   | 6856.719    | -0.009             | -0.006              |
| 5    | 1      | 5      | 4     | 1       | 4       | 4    | 3     | E   | 6856.782    | -0.016             |                     |
| 5    | 1      | 5      | 4     | 1       | 4       | 4    | 3     | A   | 6856.782    | -0.021             | -0.019              |
| 5    | 1      | 5      | 4     | 1       | 4       | 5    | 4     | E   | 6856.829    | 0.010              |                     |
| 5    | 1      | 5      | 4     | 1       | 4       | 5    | 4     | A   | 6856.829    | 0.005              | 0.007               |
| 5    | 1      | 5      | 4     | 1       | 4       | 5    | 5     | E   | 6858.605    | -0.002             |                     |
| 5    | 1      | 5      | 4     | 1       | 4       | 5    | 5     | A   | 6858.605    | -0.007             | -0.005              |
| 5    | 1      | 4      | 4     | 1       | 3       | 4    | 3     | E   | 7542.169    | -0.008             |                     |
| 5    | 1      | 4      | 4     | 1       | 3       | 4    | 3     | A   | 7542.169    | -0.025             | -0.021              |
| 5    | 1      | 4      | 4     | 1       | 3       | 6    | 5     | E   | 7542.229    | 0.021              |                     |
| 5    | 1      | 4      | 4     | 1       | 3       | 6    | 5     | A   | 7542.229    | 0.004              | 0.008               |
| 5    | 1      | 4      | 4     | 1       | 3       | 5    | 4     | E   | 7542.289    | 0.011              |                     |
| 5    | 1      | 4      | 4     | 1       | 3       | 5    | 4     | A   | 7542.289    | -0.006             | -0.002              |
| 5    | 2      | 4      | 4     | 2       | 3       | 6    | 5     | E   | 7209.908    | -0.002             |                     |
| 5    | 2      | 4      | 4     | 2       | 3       | 6    | 5     | A   | 7209.908    | 0.008              | 0.011               |
| 5    | 2      | 4      | 4     | 2       | 3       | 5    | 4     | E   | 7210.094    | -0.008             |                     |
| 5    | 2      | 4      | 4     | 2       | 3       | 5    | 4     | A   | 7210.094    | 0.003              | 0.006               |
| 5    | 2      | 3      | 4     | 2       | 2       | 4    | 3     | A   | 7304.938    | -0.038             | -0.035              |
| 5    | 2      | 3      | 4     | 2       | 2       | 6    | 5     | A   | 7304.995    | 0.011              | 0.015               |
| 5    | 2      | 3      | 4     | 2       | 2       | 5    | 4     | A   | 7305.062    | 0.007              | 0.011               |
| 5    | 3      | 3      | 4     | 3       | 2       | 4    | 3     | A   | 7236.077    | -0.002             | 0.001               |
| 5    | 3      | 3      | 4     | 3       | 2       | 6    | 5     | A   | 7236.164    | -0.005             | -0.001              |
| 5    | 3      | 3      | 4     | 3       | 2       | 5    | 4     | A   | 7236.515    | -0.008             | -0.005              |
| 5    | 3      | 2      | 4     | 3       | 1       | 4    | 3     | A   | 7238.309    | -0.006             | -0.002              |

*Continued on next page*

Table S1 – *continued from previous page*

| $J'$ | $K'_a$ | $K'_c$ | $J''$ | $K''_a$ | $K''_c$ | $F'$ | $F''$ | Sym | $\nu_{obs}$ | $\Delta\nu_{XIAM}$ | $\Delta\nu_{SPFIT}$ |
|------|--------|--------|-------|---------|---------|------|-------|-----|-------------|--------------------|---------------------|
| 5    | 3      | 2      | 4     | 3       | 1       | 6    | 5     | A   | 7238.399    | -0.004             | -0.001              |
| 5    | 3      | 2      | 4     | 3       | 1       | 5    | 4     | A   | 7238.742    | -0.010             | -0.007              |
| 5    | 0      | 5      | 4     | 1       | 4       | 5    | 4     | E   | 4823.715    | 0.003              |                     |
| 5    | 0      | 5      | 4     | 1       | 4       | 5    | 4     | A   | 4823.715    | 0.001              | 0.001               |
| 5    | 0      | 5      | 4     | 1       | 4       | 6    | 5     | E   | 4824.328    | 0.003              |                     |
| 5    | 0      | 5      | 4     | 1       | 4       | 6    | 5     | A   | 4824.328    | 0.001              | 0.001               |
| 5    | 0      | 5      | 4     | 1       | 4       | 4    | 3     | E   | 4824.549    | 0.004              |                     |
| 5    | 0      | 5      | 4     | 1       | 4       | 4    | 3     | A   | 4824.549    | 0.002              | 0.002               |
| 5    | 1      | 4      | 5     | 0       | 5       | 5    | 5     | A   | 4091.689    | -0.010             | -0.003              |
| 5    | 1      | 4      | 5     | 0       | 5       | 6    | 6     | A   | 4093.100    | -0.010             | -0.004              |
| 5    | 1      | 4      | 5     | 0       | 5       | 4    | 4     | A   | 4093.397    | -0.001             | 0.005               |
| 5    | 2      | 3      | 5     | 1       | 4       | 4    | 4     | E   | 7944.323    | 0.061              |                     |
| 5    | 2      | 3      | 5     | 1       | 4       | 4    | 4     | A   | 7944.323    | 0.039              | 0.050               |
| 5    | 2      | 3      | 5     | 1       | 4       | 6    | 6     | E   | 7944.403    | 0.053              |                     |
| 5    | 2      | 3      | 5     | 1       | 4       | 6    | 6     | A   | 7944.403    | 0.031              | 0.042               |
| 5    | 2      | 3      | 5     | 1       | 4       | 5    | 5     | E   | 7944.765    | -0.018             |                     |
| 5    | 2      | 3      | 5     | 1       | 4       | 5    | 5     | A   | 7944.765    | -0.040             | -0.030              |
| 6    | 1      | 6      | 5     | 1       | 5       | 7    | 6     | A   | 8216.353    | -0.003             | -0.001              |
| 6    | 1      | 6      | 5     | 1       | 5       | 6    | 5     | A   | 8216.429    | -0.004             | -0.002              |
| 6    | 0      | 6      | 5     | 1       | 5       | 6    | 5     | E   | 6468.642    | 0.005              |                     |
| 6    | 0      | 6      | 5     | 1       | 5       | 6    | 5     | A   | 6468.642    | -0.002             | -0.001              |
| 6    | 0      | 6      | 5     | 1       | 5       | 7    | 6     | E   | 6469.203    | 0.004              |                     |
| 6    | 0      | 6      | 5     | 1       | 5       | 7    | 6     | A   | 6469.203    | -0.003             | -0.002              |
| 6    | 0      | 6      | 5     | 1       | 5       | 5    | 4     | E   | 6469.365    | 0.005              |                     |
| 6    | 0      | 6      | 5     | 1       | 5       | 5    | 4     | A   | 6469.365    | -0.001             | -0.001              |
| 6    | 1      | 5      | 6     | 0       | 6       | 6    | 6     | A   | 4625.677    | -0.012             | -0.004              |
| 6    | 1      | 5      | 6     | 0       | 6       | 7    | 7     | A   | 4627.172    | -0.011             | -0.004              |
| 6    | 1      | 5      | 6     | 0       | 6       | 5    | 5     | A   | 4627.431    | -0.004             | 0.003               |
| 6    | 2      | 4      | 6     | 1       | 5       | 5    | 5     | E   | 7714.828    | 0.010              |                     |
| 6    | 2      | 4      | 6     | 1       | 5       | 5    | 5     | A   | 7714.828    | -0.018             | -0.008              |
| 6    | 2      | 4      | 6     | 1       | 5       | 7    | 7     | E   | 7714.896    | 0.017              |                     |
| 6    | 2      | 4      | 6     | 1       | 5       | 7    | 7     | A   | 7714.896    | -0.011             | -0.001              |
| 6    | 2      | 4      | 6     | 1       | 5       | 6    | 6     | E   | 7715.246    | 0.010              |                     |
| 6    | 2      | 4      | 6     | 1       | 5       | 6    | 6     | A   | 7715.246    | -0.018             | -0.008              |
| 7    | 1      | 6      | 7     | 0       | 7       | 7    | 7     | A   | 5290.035    | -0.014             | -0.005              |
| 7    | 1      | 6      | 7     | 0       | 7       | 8    | 8     | A   | 5291.626    | -0.007             | 0.001               |
| 7    | 1      | 6      | 7     | 0       | 7       | 6    | 6     | A   | 5291.851    | -0.011             | -0.002              |
| 7    | 2      | 5      | 7     | 1       | 6       | 6    | 6     | E   | 7519.477    | -0.026             |                     |
| 7    | 2      | 5      | 7     | 1       | 6       | 6    | 6     | A   | 7519.534    | 0.000              | 0.010               |
| 7    | 2      | 5      | 7     | 1       | 6       | 8    | 8     | E   | 7519.534    | -0.003             |                     |
| 7    | 2      | 5      | 7     | 1       | 6       | 8    | 8     | A   | 7519.579    | 0.011              | 0.021               |
| 7    | 2      | 5      | 7     | 1       | 6       | 7    | 7     | E   | 7519.771    | -0.004             |                     |
| 7    | 2      | 5      | 7     | 1       | 6       | 7    | 7     | A   | 7519.810    | 0.004              | 0.014               |
| 8    | 1      | 7      | 7     | 2       | 6       | 8    | 7     | E   | 5056.196    | 0.035              |                     |
| 8    | 1      | 7      | 7     | 2       | 6       | 8    | 7     | A   | 5056.196    | 0.035              | 0.030               |
| 8    | 1      | 7      | 7     | 2       | 6       | 9    | 8     | E   | 5056.985    | 0.037              |                     |
| 8    | 1      | 7      | 7     | 2       | 6       | 9    | 8     | A   | 5056.985    | 0.037              | 0.032               |
| 8    | 1      | 7      | 8     | 0       | 8       | 8    | 8     | A   | 6094.041    | 0.009              | 0.020               |
| 8    | 1      | 7      | 8     | 0       | 8       | 9    | 9     | A   | 6095.702    | 0.003              | 0.013               |
| 8    | 1      | 7      | 8     | 0       | 8       | 7    | 7     | A   | 6095.885    | -0.025             | -0.015              |
| 8    | 2      | 6      | 8     | 1       | 7       | 7    | 7     | E   | 7384.795    | 0.043              |                     |
| 8    | 2      | 6      | 8     | 1       | 7       | 7    | 7     | A   | 7384.795    | 0.008              | 0.012               |
| 8    | 2      | 6      | 8     | 1       | 7       | 9    | 9     | E   | 7384.795    | 0.031              |                     |
| 8    | 2      | 6      | 8     | 1       | 7       | 9    | 9     | A   | 7384.795    | -0.003             | 0.012               |
| 8    | 2      | 6      | 8     | 1       | 7       | 8    | 8     | E   | 7384.885    | 0.028              |                     |
| 8    | 2      | 6      | 8     | 1       | 7       | 8    | 8     | A   | 7384.885    | -0.006             | 0.004               |
| 9    | 1      | 8      | 9     | 0       | 9       | 9    | 9     | A   | 7040.700    | -0.036             | -0.032              |

*Continued on next page*



Table S1 – *continued from previous page*

| $J'$ | $K'_a$ | $K'_c$ | $J''$ | $K''_a$ | $K''_c$ | $F'$ | $F''$ | Sym | $\nu_{obs}$ | $\Delta\nu_{XIAM}$ | $\Delta\nu_{SPFIT}$ |
|------|--------|--------|-------|---------|---------|------|-------|-----|-------------|--------------------|---------------------|
| 9    | 2      | 7      | 9     | 1       | 8       | 9    | 9     | E   | 7335.091    | -0.004             |                     |
| 9    | 2      | 7      | 9     | 1       | 8       | 9    | 9     | A   | 7335.091    | -0.043             | -0.033              |
| 9    | 2      | 7      | 9     | 1       | 8       | 10   | 10    | E   | 7335.186    | 0.026              |                     |
| 9    | 2      | 7      | 9     | 1       | 8       | 10   | 10    | A   | 7335.186    | -0.013             | -0.007              |
| 9    | 2      | 7      | 9     | 1       | 8       | 8    | 8     | E   | 7335.186    | 0.019              |                     |
| 9    | 2      | 7      | 9     | 1       | 8       | 8    | 8     | A   | 7335.186    | -0.020             | -0.007              |
| 9    | 9      | 0      | 8     | 8       | 0       | 9    | 8     | E   | 62795.660   | -0.052             |                     |
| 9    | 9      | 0      | 8     | 8       | 1       | 9    | 8     | A   | 62795.110   | -0.091             | -0.100              |
| 9    | 9      | 1      | 8     | 8       | 0       | 9    | 8     | A   | 62795.110   | -0.091             | -0.100              |
| 10   | 2      | 8      | 10    | 1       | 9       | 10   | 10    | E   | 7392.054    | -0.014             |                     |
| 10   | 2      | 8      | 10    | 1       | 9       | 10   | 10    | A   | 7392.102    | -0.013             | -0.003              |
| 10   | 9      | 1      | 9     | 8       | 1       | 10   | 9     | E   | 64241.390   | -0.007             |                     |
| 10   | 9      | 1      | 9     | 8       | 2       | 10   | 9     | A   | 64240.990   | 0.101              | 0.090               |
| 10   | 9      | 2      | 9     | 8       | 1       | 10   | 9     | A   | 64240.990   | 0.101              | 0.090               |
| 10   | 10     | 0      | 9     | 9       | 0       | 10   | 9     | E   | 70097.880   | -0.167             |                     |
| 10   | 10     | 0      | 9     | 9       | 1       | 10   | 9     | A   | 70097.630   | 0.054              | 0.022               |
| 10   | 10     | 1      | 9     | 9       | 0       | 10   | 9     | A   | 70097.630   | 0.054              | 0.022               |
| 10   | 10     | 1      | 9     | 9       | 1       | 10   | 9     | E   | 70096.310   | -0.125             |                     |
| 11   | 8      | 3      | 10    | 7       | 3       | 11   | 10    | E   | 59829.600   | -0.027             |                     |
| 11   | 8      | 3      | 10    | 7       | 4       | 11   | 10    | A   | 59829.140   | 0.055              | 0.058               |
| 11   | 8      | 4      | 10    | 7       | 3       | 11   | 10    | A   | 59829.140   | 0.055              | 0.058               |
| 11   | 8      | 4      | 10    | 7       | 4       | 11   | 10    | E   | 59828.000   | 0.000              |                     |
| 11   | 9      | 2      | 10    | 8       | 2       | 11   | 10    | E   | 65686.950   | 0.003              |                     |
| 11   | 9      | 2      | 10    | 8       | 3       | 11   | 10    | A   | 65686.470   | 0.028              | 0.015               |
| 11   | 9      | 3      | 10    | 8       | 2       | 11   | 10    | A   | 65686.470   | 0.028              | 0.015               |
| 11   | 9      | 3      | 10    | 8       | 3       | 11   | 10    | E   | 65685.300   | -0.028             |                     |
| 11   | 10     | 1      | 10    | 9       | 1       | 11   | 10    | E   | 71543.770   | 0.028              |                     |
| 11   | 10     | 1      | 10    | 9       | 2       | 11   | 10    | A   | 71543.260   | -0.014             | -0.049              |
| 11   | 10     | 2      | 10    | 9       | 1       | 11   | 10    | A   | 71543.260   | -0.014             | -0.049              |
| 11   | 10     | 2      | 10    | 9       | 2       | 11   | 10    | E   | 71542.170   | 0.039              |                     |
| 11   | 11     | 0      | 10    | 10      | 0       | 11   | 10    | E   | 77400.190   | -0.107             |                     |
| 11   | 11     | 0      | 10    | 10      | 1       | 11   | 10    | A   | 77399.890   | 0.025              | -0.040              |
| 11   | 11     | 1      | 10    | 10      | 0       | 11   | 10    | A   | 77399.890   | 0.025              | -0.040              |
| 11   | 11     | 1      | 10    | 10      | 1       | 11   | 10    | E   | 77398.660   | -0.035             |                     |
| 12   | 8      | 4      | 11    | 7       | 4       | 12   | 11    | E   | 61274.320   | 0.008              |                     |
| 12   | 8      | 4      | 11    | 7       | 5       | 12   | 11    | A   | 61273.760   | -0.013             | -0.013              |
| 12   | 8      | 5      | 11    | 7       | 4       | 12   | 11    | A   | 61273.760   | -0.013             | -0.013              |
| 12   | 8      | 5      | 11    | 7       | 5       | 12   | 11    | E   | 61272.710   | 0.024              |                     |
| 12   | 9      | 3      | 11    | 8       | 3       | 12   | 11    | E   | 67132.240   | -0.018             |                     |
| 12   | 9      | 3      | 11    | 8       | 4       | 12   | 11    | A   | 67131.820   | 0.064              | 0.048               |
| 12   | 9      | 4      | 11    | 8       | 3       | 12   | 11    | A   | 67131.820   | 0.064              | 0.048               |
| 12   | 9      | 4      | 11    | 8       | 4       | 12   | 11    | E   | 67130.660   | 0.020              |                     |
| 12   | 10     | 2      | 11    | 9       | 2       | 12   | 11    | E   | 72989.370   | 0.039              |                     |
| 12   | 10     | 2      | 11    | 9       | 3       | 12   | 11    | A   | 72988.900   | 0.034              | -0.004              |
| 12   | 10     | 3      | 11    | 9       | 2       | 12   | 11    | A   | 72988.900   | 0.034              | -0.004              |
| 12   | 10     | 3      | 11    | 9       | 3       | 12   | 11    | E   | 72987.780   | 0.058              |                     |
| 13   | 8      | 5      | 12    | 7       | 5       | 13   | 12    | E   | 62718.260   | -0.064             |                     |
| 13   | 8      | 5      | 12    | 7       | 6       | 13   | 12    | A   | 62717.800   | 0.012              | 0.008               |
| 13   | 8      | 6      | 12    | 7       | 5       | 13   | 12    | A   | 62717.800   | 0.012              | 0.008               |
| 13   | 8      | 6      | 12    | 7       | 6       | 13   | 12    | E   | 62716.550   | -0.150             |                     |
| 13   | 9      | 4      | 12    | 8       | 4       | 13   | 12    | E   | 68577.170   | -0.041             |                     |
| 13   | 9      | 4      | 12    | 8       | 5       | 13   | 12    | A   | 68576.740   | 0.029              | 0.009               |
| 13   | 9      | 5      | 12    | 8       | 4       | 13   | 12    | A   | 68576.740   | 0.029              | 0.009               |
| 13   | 9      | 5      | 12    | 8       | 5       | 13   | 12    | E   | 68575.550   | -0.044             |                     |
| 13   | 10     | 3      | 12    | 9       | 3       | 13   | 12    | E   | 74434.670   | -0.065             |                     |
| 13   | 10     | 3      | 12    | 9       | 4       | 13   | 12    | A   | 74434.330   | 0.058              | 0.015               |
| 13   | 10     | 4      | 12    | 9       | 3       | 13   | 12    | A   | 74434.330   | 0.058              | 0.015               |

*Continued on next page*

Table S1 – *continued from previous page*

| $J'$ | $K'_a$ | $K'_c$ | $J''$ | $K''_a$ | $K''_c$ | $F'$ | $F''$ | Sym | $\nu_{obs}$ | $\Delta\nu_{XIAM}$ | $\Delta\nu_{SPFIT}$ |
|------|--------|--------|-------|---------|---------|------|-------|-----|-------------|--------------------|---------------------|
| 13   | 10     | 4      | 12    | 9       | 4       | 13   | 12    | E   | 74433.030   | -0.097             |                     |
| 14   | 8      | 6      | 13    | 7       | 6       | 14   | 13    | E   | 64161.380   | -0.069             |                     |
| 14   | 8      | 6      | 13    | 7       | 7       | 14   | 13    | A   | 64160.900   | -0.016             | -0.024              |
| 14   | 8      | 7      | 13    | 7       | 6       | 14   | 13    | A   | 64160.900   | -0.016             | -0.024              |
| 14   | 8      | 7      | 13    | 7       | 7       | 14   | 13    | E   | 64159.770   | -0.056             |                     |
| 14   | 9      | 5      | 13    | 8       | 5       | 14   | 13    | E   | 70021.630   | -0.038             |                     |
| 14   | 9      | 5      | 13    | 8       | 6       | 14   | 13    | A   | 70021.210   | 0.039              | 0.014               |
| 14   | 9      | 6      | 13    | 8       | 5       | 14   | 13    | A   | 70021.210   | 0.039              | 0.014               |
| 14   | 9      | 6      | 13    | 8       | 6       | 14   | 13    | E   | 70020.040   | -0.013             |                     |
| 15   | 7      | 8      | 14    | 6       | 8       | 15   | 14    | E   | 59734.980   | -0.029             |                     |
| 15   | 7      | 8      | 14    | 6       | 9       | 15   | 14    | A   | 59734.450   | -0.023             | 0.006               |
| 15   | 7      | 9      | 14    | 6       | 8       | 15   | 14    | A   | 59734.450   | 0.042              | 0.006               |
| 15   | 7      | 9      | 14    | 6       | 9       | 15   | 14    | E   | 59733.340   | -0.037             |                     |
| 15   | 8      | 7      | 14    | 7       | 7       | 15   | 14    | E   | 65603.460   | 0.012              |                     |
| 15   | 8      | 7      | 14    | 7       | 8       | 15   | 14    | A   | 65602.970   | 0.052              | 0.039               |
| 15   | 8      | 8      | 14    | 7       | 7       | 15   | 14    | A   | 65602.970   | 0.053              | 0.039               |
| 15   | 8      | 8      | 14    | 7       | 8       | 15   | 14    | E   | 65601.820   | -0.006             |                     |
| 15   | 9      | 6      | 14    | 8       | 6       | 15   | 14    | E   | 71465.360   | -0.117             |                     |
| 15   | 9      | 6      | 14    | 8       | 7       | 15   | 14    | A   | 71465.000   | 0.017              | -0.013              |
| 15   | 9      | 7      | 14    | 8       | 6       | 15   | 14    | A   | 71465.000   | 0.017              | -0.013              |
| 15   | 9      | 7      | 14    | 8       | 7       | 15   | 14    | E   | 71463.870   | 0.007              |                     |
| 15   | 10     | 5      | 14    | 9       | 5       | 15   | 14    | E   | 77324.590   | -0.020             |                     |
| 15   | 10     | 5      | 14    | 9       | 6       | 15   | 14    | A   | 77324.240   | 0.087              | 0.034               |
| 15   | 10     | 6      | 14    | 9       | 5       | 15   | 14    | A   | 77324.240   | 0.087              | 0.034               |
| 15   | 10     | 6      | 14    | 9       | 6       | 15   | 14    | E   | 77323.040   | 0.035              |                     |
| 16   | 7      | 9      | 15    | 6       | 9       | 16   | 15    | E   | 61170.840   | -0.012             |                     |
| 16   | 7      | 9      | 15    | 6       | 10      | 16   | 15    | A   | 61170.350   | -0.011             | 0.054               |
| 16   | 7      | 10     | 15    | 6       | 9       | 16   | 15    | A   | 61170.350   | 0.140              | 0.054               |
| 16   | 7      | 10     | 15    | 6       | 10      | 16   | 15    | E   | 61169.210   | -0.010             |                     |
| 16   | 8      | 8      | 15    | 7       | 8       | 16   | 15    | E   | 67044.080   | 0.024              |                     |
| 16   | 8      | 8      | 15    | 7       | 9       | 16   | 15    | A   | 67043.520   | -0.009             | -0.028              |
| 16   | 8      | 9      | 15    | 7       | 8       | 16   | 15    | A   | 67043.520   | -0.006             | -0.028              |
| 16   | 8      | 9      | 15    | 7       | 9       | 16   | 15    | E   | 67042.430   | -0.004             |                     |
| 16   | 9      | 7      | 15    | 8       | 7       | 16   | 15    | E   | 72908.430   | -0.037             |                     |
| 16   | 9      | 7      | 15    | 8       | 8       | 16   | 15    | A   | 72908.020   | 0.044              | 0.008               |
| 16   | 9      | 8      | 15    | 8       | 7       | 16   | 15    | A   | 72908.020   | 0.044              | 0.008               |
| 16   | 9      | 8      | 15    | 8       | 8       | 16   | 15    | E   | 72906.790   | -0.064             |                     |
| 17   | 7      | 10     | 16    | 6       | 10      | 17   | 16    | E   | 62603.670   | -0.052             |                     |
| 17   | 7      | 10     | 16    | 6       | 11      | 17   | 16    | A   | 62603.190   | -0.135             | 0.013               |
| 17   | 7      | 11     | 16    | 6       | 10      | 17   | 16    | A   | 62603.190   | 0.196              | 0.013               |
| 17   | 7      | 11     | 16    | 6       | 11      | 17   | 16    | E   | 62602.100   | 0.006              |                     |
| 17   | 8      | 9      | 16    | 7       | 9       | 17   | 16    | E   | 68482.970   | -0.011             |                     |
| 17   | 8      | 9      | 16    | 7       | 10      | 17   | 16    | A   | 68482.510   | 0.053              | 0.028               |
| 17   | 8      | 10     | 16    | 7       | 9       | 17   | 16    | A   | 68482.510   | 0.059              | 0.028               |
| 17   | 8      | 10     | 16    | 7       | 10      | 17   | 16    | E   | 68481.360   | 0.001              |                     |
| 17   | 9      | 8      | 16    | 8       | 8       | 17   | 16    | E   | 74350.420   | -0.032             |                     |
| 17   | 9      | 8      | 16    | 8       | 9       | 17   | 16    | A   | 74350.030   | 0.068              | 0.023               |
| 17   | 9      | 9      | 16    | 8       | 8       | 17   | 16    | A   | 74350.030   | 0.068              | 0.023               |
| 17   | 9      | 9      | 16    | 8       | 9       | 17   | 16    | E   | 74348.830   | -0.009             |                     |
| 18   | 7      | 11     | 17    | 6       | 11      | 18   | 17    | E   | 64033.000   | -0.076             |                     |
| 18   | 7      | 11     | 17    | 6       | 12      | 18   | 17    | A   | 64032.460   | -0.409             | -0.089              |
| 18   | 7      | 12     | 17    | 6       | 11      | 18   | 17    | A   | 64032.460   | 0.283              | -0.089              |
| 18   | 7      | 12     | 17    | 6       | 12      | 18   | 17    | E   | 64031.470   | 0.007              |                     |
| 18   | 8      | 10     | 17    | 7       | 10      | 18   | 17    | E   | 69919.870   | -0.032             |                     |
| 18   | 8      | 10     | 17    | 7       | 11      | 18   | 17    | A   | 69919.430   | 0.045              | 0.016               |
| 18   | 8      | 11     | 17    | 7       | 10      | 18   | 17    | A   | 69919.430   | 0.060              | 0.016               |
| 18   | 8      | 11     | 17    | 7       | 11      | 18   | 17    | E   | 69918.250   | -0.031             |                     |

*Continued on next page*

Table S1 – continued from previous page

| $J'$ | $K'_a$ | $K'_c$ | $J''$ | $K''_a$ | $K''_c$ | $F'$ | $F''$ | Sym | $\nu_{obs}$ | $\Delta\nu_{XIAM}$ | $\Delta\nu_{SPFIT}$ |
|------|--------|--------|-------|---------|---------|------|-------|-----|-------------|--------------------|---------------------|
| 18   | 9      | 9      | 17    | 8       | 9       | 18   | 17    | E   | 75791.180   | -0.044             |                     |
| 18   | 9      | 9      | 17    | 8       | 10      | 18   | 17    | A   | 75790.770   | 0.032              | -0.020              |
| 18   | 9      | 10     | 17    | 8       | 9       | 18   | 17    | A   | 75790.770   | 0.033              | -0.020              |
| 18   | 9      | 10     | 17    | 8       | 10      | 18   | 17    | E   | 75789.580   | -0.033             |                     |
| 19   | 7      | 12     | 18    | 6       | 12      | 19   | 18    | E   | 65458.260   | -0.042             |                     |
| 19   | 7      | 12     | 18    | 6       | 13      | 19   | 18    | A   | 65458.540   | 0.068              | 0.032               |
| 19   | 7      | 13     | 18    | 6       | 13      | 19   | 18    | E   | 65456.760   | 0.008              |                     |
| 19   | 8      | 11     | 18    | 7       | 11      | 19   | 18    | E   | 71354.450   | -0.022             |                     |
| 19   | 8      | 11     | 18    | 7       | 12      | 19   | 18    | A   | 71353.950   | -0.016             | -0.045              |
| 19   | 8      | 12     | 18    | 7       | 11      | 19   | 18    | A   | 71353.950   | 0.018              | -0.045              |
| 19   | 8      | 12     | 18    | 7       | 12      | 19   | 18    | E   | 71352.840   | -0.010             |                     |
| 19   | 9      | 10     | 18    | 8       | 10      | 19   | 18    | E   | 77230.520   | -0.042             |                     |
| 19   | 9      | 10     | 18    | 8       | 11      | 19   | 18    | A   | 77230.080   | 0.002              | -0.060              |
| 19   | 9      | 11     | 18    | 8       | 10      | 19   | 18    | A   | 77230.080   | 0.002              | -0.060              |
| 19   | 9      | 11     | 18    | 8       | 11      | 19   | 18    | E   | 77228.920   | -0.032             |                     |
| 20   | 7      | 13     | 19    | 6       | 13      | 20   | 19    | E   | 66878.620   | -0.068             |                     |
| 20   | 7      | 14     | 19    | 6       | 14      | 20   | 19    | E   | 66877.340   | -0.024             |                     |

Table S2: Experimental rotational transition frequencies of 3'(Z)-aminoacetophenone ( $\nu$ /MHz,  $\Delta\nu = \nu_{obs} - \nu_{calc}$ ).

| $J'$ | $K'_a$ | $K'_c$ | $J''$ | $K''_a$ | $K''_c$ | $F'$ | $F''$ | Sym | $\nu_{obs}$ | $\Delta\nu_{XIAM}$ | $\Delta\nu_{SPFIT}$ |
|------|--------|--------|-------|---------|---------|------|-------|-----|-------------|--------------------|---------------------|
| 1    | 1      | 1      | 0     | 0       | 0       | 0    | 1     | A   | 3302.708    | -0.006             | -0.003              |
| 1    | 1      | 1      | 0     | 0       | 0       | 0    | 1     | E   | 3302.708    | 0.006              |                     |
| 1    | 1      | 1      | 0     | 0       | 0       | 2    | 1     | A   | 3303.672    | -0.006             | -0.003              |
| 1    | 1      | 1      | 0     | 0       | 0       | 2    | 1     | E   | 3303.672    | 0.006              |                     |
| 1    | 1      | 1      | 0     | 0       | 0       | 1    | 1     | A   | 3304.312    | -0.009             | -0.005              |
| 1    | 1      | 1      | 0     | 0       | 0       | 1    | 1     | E   | 3304.312    | 0.003              |                     |
| 2    | 0      | 2      | 1     | 0       | 1       | 1    | 1     | A   | 3247.153    | -0.001             | 0.001               |
| 2    | 0      | 2      | 1     | 0       | 1       | 1    | 1     | E   | 3247.153    | 0.002              |                     |
| 2    | 0      | 2      | 1     | 0       | 1       | 3    | 2     | A   | 3248.252    | -0.001             | 0.002               |
| 2    | 0      | 2      | 1     | 0       | 1       | 3    | 2     | E   | 3248.252    | 0.002              |                     |
| 2    | 0      | 2      | 1     | 0       | 1       | 2    | 1     | A   | 3248.433    | -0.001             | 0.001               |
| 2    | 0      | 2      | 1     | 0       | 1       | 2    | 1     | E   | 3248.433    | 0.001              |                     |
| 2    | 0      | 2      | 1     | 0       | 1       | 1    | 0     | A   | 3248.756    | -0.001             | 0.001               |
| 2    | 0      | 2      | 1     | 0       | 1       | 1    | 0     | E   | 3248.756    | 0.001              |                     |
| 2    | 0      | 2      | 1     | 0       | 1       | 2    | 2     | A   | 3249.074    | -0.002             | 0.001               |
| 2    | 0      | 2      | 1     | 0       | 1       | 2    | 2     | E   | 3249.074    | 0.001              |                     |
| 2    | 1      | 2      | 1     | 1       | 1       | 1    | 1     | A   | 3026.147    | 0.000              | 0.001               |
| 2    | 1      | 2      | 1     | 1       | 1       | 1    | 1     | E   | 3026.147    | 0.000              |                     |
| 2    | 1      | 2      | 1     | 1       | 1       | 3    | 2     | A   | 3027.553    | -0.001             | 0.001               |
| 2    | 1      | 2      | 1     | 1       | 1       | 3    | 2     | E   | 3027.553    | -0.001             |                     |
| 2    | 1      | 2      | 1     | 1       | 1       | 1    | 0     | A   | 3027.752    | -0.002             | 0.000               |
| 2    | 1      | 2      | 1     | 1       | 1       | 1    | 0     | E   | 3027.752    | -0.001             |                     |
| 2    | 1      | 2      | 1     | 1       | 1       | 2    | 1     | A   | 3028.287    | 0.000              | 0.002               |
| 2    | 1      | 2      | 1     | 1       | 1       | 2    | 1     | E   | 3028.287    | 0.000              |                     |
| 2    | 1      | 2      | 1     | 1       | 1       | 2    | 2     | A   | 3028.928    | -0.002             | 0.000               |
| 2    | 1      | 2      | 1     | 1       | 1       | 2    | 2     | E   | 3028.928    | -0.002             |                     |
| 2    | 1      | 1      | 1     | 1       | 0       | 1    | 0     | A   | 3517.754    | -0.001             | 0.001               |
| 2    | 1      | 1      | 1     | 1       | 0       | 1    | 0     | E   | 3517.754    | 0.004              |                     |
| 2    | 1      | 1      | 1     | 1       | 0       | 2    | 2     | A   | 3518.608    | -0.002             | 0.001               |
| 2    | 1      | 1      | 1     | 1       | 0       | 2    | 2     | E   | 3518.608    | 0.003              |                     |
| 2    | 1      | 1      | 1     | 1       | 0       | 3    | 2     | A   | 3519.298    | -0.001             | 0.002               |
| 2    | 1      | 1      | 1     | 1       | 0       | 3    | 2     | E   | 3519.298    | 0.004              |                     |
| 2    | 1      | 1      | 1     | 1       | 0       | 2    | 1     | A   | 3519.890    | -0.004             | -0.001              |
| 2    | 1      | 1      | 1     | 1       | 0       | 2    | 1     | E   | 3519.890    | 0.001              |                     |
| 2    | 1      | 1      | 1     | 1       | 0       | 1    | 1     | A   | 3520.964    | -0.001             | 0.001               |

Continued on next page

Table S2 – *continued from previous page*

| $J'$ | $K'_a$ | $K'_c$ | $J''$ | $K''_a$ | $K''_c$ | $F'$ | $F''$ | Sym | $\nu_{obs}$ | $\Delta\nu_{XIAM}$ | $\Delta\nu_{SPFIT}$ |
|------|--------|--------|-------|---------|---------|------|-------|-----|-------------|--------------------|---------------------|
| 2    | 1      | 1      | 1     | 1       | 0       | 1    | 1     | E   | 3520.964    | 0.004              |                     |
| 2    | 1      | 2      | 1     | 0       | 1       | 1    | 1     | A   | 4693.147    | -0.008             | -0.005              |
| 2    | 1      | 2      | 1     | 0       | 1       | 1    | 1     | E   | 4693.147    | 0.003              |                     |
| 2    | 1      | 2      | 1     | 0       | 1       | 3    | 2     | A   | 4694.553    | -0.008             | -0.004              |
| 2    | 1      | 2      | 1     | 0       | 1       | 3    | 2     | E   | 4694.553    | 0.004              |                     |
| 2    | 1      | 2      | 1     | 0       | 1       | 1    | 0     | A   | 4694.749    | -0.010             | -0.006              |
| 2    | 1      | 2      | 1     | 0       | 1       | 1    | 0     | E   | 4694.749    | 0.002              |                     |
| 2    | 1      | 2      | 1     | 0       | 1       | 2    | 1     | A   | 4695.286    | -0.009             | -0.006              |
| 2    | 1      | 2      | 1     | 0       | 1       | 2    | 1     | E   | 4695.286    | 0.002              |                     |
| 2    | 1      | 2      | 1     | 0       | 1       | 2    | 2     | A   | 4695.927    | -0.010             | -0.006              |
| 2    | 1      | 2      | 1     | 0       | 1       | 2    | 2     | E   | 4695.927    | 0.002              |                     |
| 2    | 1      | 1      | 2     | 0       | 2       | 2    | 2     | A   | 2182.661    | -0.004             | -0.003              |
| 2    | 1      | 1      | 2     | 0       | 2       | 2    | 2     | E   | 2182.661    | 0.008              |                     |
| 2    | 1      | 1      | 2     | 0       | 2       | 3    | 3     | A   | 2184.168    | -0.009             | -0.007              |
| 2    | 1      | 1      | 2     | 0       | 2       | 3    | 3     | E   | 2184.168    | 0.003              |                     |
| 2    | 1      | 1      | 2     | 0       | 2       | 1    | 1     | A   | 2185.015    | -0.002             | 0.000               |
| 2    | 1      | 1      | 2     | 0       | 2       | 1    | 1     | E   | 2185.015    | 0.010              |                     |
| 2    | 2      | 0      | 2     | 1       | 1       | 2    | 1     | A   | 5025.075    | 0.005              | 0.010               |
| 2    | 2      | 0      | 2     | 1       | 1       | 2    | 1     | E   | 5025.075    | -0.008             |                     |
| 2    | 2      | 0      | 2     | 1       | 1       | 2    | 3     | A   | 5025.453    | 0.001              | 0.005               |
| 2    | 2      | 0      | 2     | 1       | 1       | 2    | 3     | E   | 5025.453    | -0.012             |                     |
| 2    | 2      | 0      | 2     | 1       | 1       | 2    | 2     | A   | 5026.144    | 0.003              | 0.007               |
| 2    | 2      | 0      | 2     | 1       | 1       | 2    | 2     | E   | 5026.144    | -0.010             |                     |
| 2    | 2      | 0      | 2     | 1       | 1       | 3    | 3     | A   | 5026.278    | 0.002              | 0.007               |
| 2    | 2      | 0      | 2     | 1       | 1       | 3    | 3     | E   | 5026.278    | -0.010             |                     |
| 2    | 2      | 0      | 2     | 1       | 1       | 1    | 1     | A   | 5026.350    | 0.000              | 0.004               |
| 2    | 2      | 0      | 2     | 1       | 1       | 1    | 1     | E   | 5026.350    | -0.013             |                     |
| 2    | 2      | 0      | 2     | 1       | 1       | 3    | 2     | A   | 5026.970    | 0.006              | 0.010               |
| 2    | 2      | 0      | 2     | 1       | 1       | 3    | 2     | E   | 5026.970    | -0.007             |                     |
| 2    | 2      | 0      | 2     | 1       | 1       | 1    | 2     | A   | 5027.427    | 0.005              | 0.010               |
| 2    | 2      | 0      | 2     | 1       | 1       | 1    | 2     | E   | 5027.427    | -0.007             |                     |
| 2    | 2      | 1      | 2     | 1       | 2       | 2    | 2     | A   | 5736.826    | 0.003              | 0.007               |
| 2    | 2      | 1      | 2     | 1       | 2       | 2    | 2     | E   | 5736.748    | 0.000              |                     |
| 2    | 2      | 1      | 2     | 1       | 2       | 3    | 2     | A   | 5737.515    | 0.005              | 0.009               |
| 2    | 2      | 1      | 2     | 1       | 2       | 3    | 2     | E   | 5737.438    | 0.002              |                     |
| 2    | 2      | 1      | 2     | 1       | 2       | 1    | 2     | A   | 5737.897    | 0.005              | 0.009               |
| 2    | 2      | 1      | 2     | 1       | 2       | 1    | 2     | E   | 5737.816    | -0.002             |                     |
| 2    | 2      | 1      | 2     | 1       | 2       | 2    | 3     | A   | 5738.201    | 0.002              | 0.007               |
| 2    | 2      | 1      | 2     | 1       | 2       | 2    | 3     | E   | 5738.122    | -0.002             |                     |
| 2    | 2      | 1      | 2     | 1       | 2       | 3    | 3     | A   | 5738.886    | 0.000              | 0.005               |
| 2    | 2      | 1      | 2     | 1       | 2       | 3    | 3     | E   | 5738.810    | -0.002             |                     |
| 2    | 2      | 1      | 2     | 1       | 2       | 2    | 1     | A   | 5738.966    | 0.003              | 0.008               |
| 2    | 2      | 1      | 2     | 1       | 2       | 2    | 1     | E   | 5738.886    | -0.003             |                     |
| 2    | 2      | 1      | 2     | 1       | 2       | 1    | 1     | A   | 5740.035    | 0.003              | 0.008               |
| 2    | 2      | 1      | 2     | 1       | 2       | 1    | 1     | E   | 5739.959    | 0.001              |                     |
| 3    | 0      | 3      | 2     | 0       | 2       | 2    | 2     | A   | 4809.863    | -0.004             | -0.001              |
| 3    | 0      | 3      | 2     | 0       | 2       | 2    | 2     | E   | 4809.863    | 0.000              |                     |
| 3    | 0      | 3      | 2     | 0       | 2       | 4    | 3     | A   | 4811.055    | -0.004             | -0.001              |
| 3    | 0      | 3      | 2     | 0       | 2       | 4    | 3     | E   | 4811.055    | -0.001             |                     |
| 3    | 0      | 3      | 2     | 0       | 2       | 2    | 1     | A   | 4811.142    | -0.005             | -0.002              |
| 3    | 0      | 3      | 2     | 0       | 2       | 2    | 1     | E   | 4811.142    | -0.002             |                     |
| 3    | 0      | 3      | 2     | 0       | 2       | 3    | 2     | A   | 4811.288    | -0.004             | -0.001              |
| 3    | 0      | 3      | 2     | 0       | 2       | 3    | 2     | E   | 4811.288    | 0.000              |                     |
| 3    | 0      | 3      | 2     | 0       | 2       | 3    | 3     | A   | 4812.111    | -0.004             | -0.001              |
| 3    | 0      | 3      | 2     | 0       | 2       | 3    | 3     | E   | 4812.111    | -0.001             |                     |
| 3    | 1      | 3      | 2     | 1       | 2       | 2    | 2     | A   | 4524.532    | -0.006             | -0.004              |
| 3    | 1      | 3      | 2     | 1       | 2       | 2    | 2     | E   | 4524.532    | -0.004             |                     |

*Continued on next page*

Table S2 – *continued from previous page*

| $J'$ | $K'_a$ | $K'_c$ | $J''$ | $K''_a$ | $K''_c$ | $F'$ | $F''$ | Sym | $\nu_{obs}$ | $\Delta\nu_{XIAM}$ | $\Delta\nu_{SPFIT}$ |
|------|--------|--------|-------|---------|---------|------|-------|-----|-------------|--------------------|---------------------|
| 3    | 1      | 3      | 2     | 1       | 2       | 4    | 3     | A   | 4526.487    | -0.003             | 0.000               |
| 3    | 1      | 3      | 2     | 1       | 2       | 4    | 3     | E   | 4526.487    | -0.001             |                     |
| 3    | 1      | 3      | 2     | 1       | 2       | 2    | 1     | A   | 4526.676    | -0.002             | 0.001               |
| 3    | 1      | 3      | 2     | 1       | 2       | 2    | 1     | E   | 4526.676    | 0.000              |                     |
| 3    | 1      | 3      | 2     | 1       | 2       | 3    | 2     | A   | 4526.758    | -0.002             | 0.001               |
| 3    | 1      | 3      | 2     | 1       | 2       | 3    | 2     | E   | 4526.758    | 0.000              |                     |
| 3    | 1      | 3      | 2     | 1       | 2       | 3    | 3     | A   | 4528.133    | -0.003             | 0.000               |
| 3    | 1      | 3      | 2     | 1       | 2       | 3    | 3     | E   | 4528.133    | -0.001             |                     |
| 3    | 1      | 2      | 2     | 1       | 1       | 3    | 3     | A   | 5261.854    | -0.004             | 0.000               |
| 3    | 1      | 2      | 2     | 1       | 1       | 3    | 3     | E   | 5261.854    | 0.002              |                     |
| 3    | 1      | 2      | 2     | 1       | 1       | 2    | 1     | A   | 5262.130    | -0.004             | 0.000               |
| 3    | 1      | 2      | 2     | 1       | 1       | 2    | 1     | E   | 5262.130    | 0.002              |                     |
| 3    | 1      | 2      | 2     | 1       | 1       | 4    | 3     | A   | 5262.342    | -0.004             | 0.000               |
| 3    | 1      | 2      | 2     | 1       | 1       | 4    | 3     | E   | 5262.342    | 0.002              |                     |
| 3    | 1      | 2      | 2     | 1       | 1       | 3    | 2     | A   | 5262.542    | -0.004             | -0.001              |
| 3    | 1      | 2      | 2     | 1       | 1       | 3    | 2     | E   | 5262.542    | 0.002              |                     |
| 3    | 1      | 2      | 2     | 1       | 1       | 2    | 2     | A   | 5263.201    | -0.004             | -0.001              |
| 3    | 1      | 2      | 2     | 1       | 1       | 2    | 2     | E   | 5263.201    | 0.002              |                     |
| 3    | 2      | 2      | 2     | 2       | 1       | 2    | 1     | A   | 4909.789    | -0.010             | -0.006              |
| 3    | 2      | 2      | 2     | 2       | 1       | 2    | 1     | E   | 4909.838    | 0.010              |                     |
| 3    | 2      | 2      | 2     | 2       | 1       | 4    | 3     | A   | 4910.172    | -0.008             | -0.005              |
| 3    | 2      | 2      | 2     | 2       | 1       | 4    | 3     | E   | 4910.217    | 0.007              |                     |
| 3    | 2      | 2      | 2     | 2       | 1       | 3    | 2     | A   | 4910.862    | -0.006             | -0.002              |
| 3    | 2      | 2      | 2     | 2       | 1       | 3    | 2     | E   | 4910.903    | 0.006              |                     |
| 3    | 2      | 1      | 2     | 2       | 0       | 2    | 2     | A   | 5010.357    | -0.016             | -0.012              |
| 3    | 2      | 1      | 2     | 2       | 0       | 2    | 2     | E   | 5010.357    | 0.023              |                     |
| 3    | 2      | 1      | 2     | 2       | 0       | 2    | 1     | A   | 5009.074    | -0.018             | -0.015              |
| 3    | 2      | 1      | 2     | 2       | 0       | 2    | 1     | E   | 5009.074    | 0.020              |                     |
| 3    | 2      | 1      | 2     | 2       | 0       | 4    | 3     | A   | 5009.411    | -0.018             | -0.015              |
| 3    | 2      | 1      | 2     | 2       | 0       | 4    | 3     | E   | 5009.411    | 0.020              |                     |
| 3    | 2      | 1      | 2     | 2       | 0       | 3    | 2     | A   | 5009.891    | -0.018             | -0.015              |
| 3    | 2      | 1      | 2     | 2       | 0       | 3    | 2     | E   | 5009.891    | 0.020              |                     |
| 3    | 0      | 3      | 2     | 1       | 2       | 2    | 2     | A   | 3363.007    | 0.002              | 0.003               |
| 3    | 0      | 3      | 2     | 1       | 2       | 2    | 2     | E   | 3363.007    | -0.004             |                     |
| 3    | 0      | 3      | 2     | 1       | 2       | 3    | 2     | A   | 3364.432    | 0.001              | 0.003               |
| 3    | 0      | 3      | 2     | 1       | 2       | 3    | 2     | E   | 3364.432    | -0.004             |                     |
| 3    | 0      | 3      | 2     | 1       | 2       | 4    | 3     | A   | 3364.752    | 0.001              | 0.003               |
| 3    | 0      | 3      | 2     | 1       | 2       | 4    | 3     | E   | 3364.752    | -0.004             |                     |
| 3    | 0      | 3      | 2     | 1       | 2       | 2    | 1     | A   | 3365.144    | -0.002             | 0.000               |
| 3    | 0      | 3      | 2     | 1       | 2       | 2    | 1     | E   | 3365.144    | -0.007             |                     |
| 3    | 0      | 3      | 2     | 1       | 2       | 3    | 3     | A   | 3365.808    | 0.001              | 0.003               |
| 3    | 0      | 3      | 2     | 1       | 2       | 3    | 3     | E   | 3365.808    | -0.004             |                     |
| 3    | 1      | 3      | 2     | 0       | 2       | 2    | 2     | A   | 5971.390    | -0.009             | -0.006              |
| 3    | 1      | 3      | 2     | 0       | 2       | 2    | 2     | E   | 5971.390    | 0.002              |                     |
| 3    | 1      | 3      | 2     | 0       | 2       | 2    | 1     | A   | 5972.670    | -0.009             | -0.005              |
| 3    | 1      | 3      | 2     | 0       | 2       | 2    | 1     | E   | 5972.670    | 0.001              |                     |
| 3    | 1      | 3      | 2     | 0       | 2       | 4    | 3     | A   | 5972.790    | -0.008             | -0.004              |
| 3    | 1      | 3      | 2     | 0       | 2       | 4    | 3     | E   | 5972.790    | 0.002              |                     |
| 3    | 1      | 3      | 2     | 0       | 2       | 3    | 2     | A   | 5973.613    | -0.008             | -0.004              |
| 3    | 1      | 3      | 2     | 0       | 2       | 3    | 2     | E   | 5973.613    | 0.002              |                     |
| 3    | 1      | 3      | 2     | 0       | 2       | 3    | 3     | A   | 5974.436    | -0.008             | -0.004              |
| 3    | 1      | 3      | 2     | 0       | 2       | 3    | 3     | E   | 5974.436    | 0.002              |                     |
| 3    | 1      | 2      | 3     | 0       | 3       | 3    | 3     | A   | 2633.914    | -0.006             | -0.003              |
| 3    | 1      | 2      | 3     | 0       | 3       | 3    | 3     | E   | 2633.914    | 0.009              |                     |
| 3    | 1      | 2      | 3     | 0       | 3       | 4    | 4     | A   | 2635.455    | -0.009             | -0.006              |
| 3    | 1      | 2      | 3     | 0       | 3       | 4    | 4     | E   | 2635.455    | 0.006              |                     |
| 3    | 1      | 2      | 3     | 0       | 3       | 2    | 2     | A   | 2636.002    | -0.002             | 0.001               |

*Continued on next page*

Table S2 – *continued from previous page*

| $J'$ | $K'_a$ | $K'_c$ | $J''$ | $K''_a$ | $K''_c$ | $F'$ | $F''$ | Sym | $\nu_{obs}$ | $\Delta\nu_{XIAM}$ | $\Delta\nu_{SPFIT}$ |
|------|--------|--------|-------|---------|---------|------|-------|-----|-------------|--------------------|---------------------|
| 3    | 1      | 2      | 3     | 0       | 3       | 2    | 2     | E   | 2636.002    | 0.013              |                     |
| 3    | 2      | 1      | 3     | 1       | 2       | 3    | 2     | A   | 4772.833    | -0.012             | -0.007              |
| 3    | 2      | 1      | 3     | 1       | 2       | 3    | 2     | E   | 4772.833    | 0.007              |                     |
| 3    | 2      | 1      | 3     | 1       | 2       | 3    | 4     | A   | 4773.004    | -0.012             | -0.008              |
| 3    | 2      | 1      | 3     | 1       | 2       | 3    | 4     | E   | 4773.004    | 0.008              |                     |
| 3    | 2      | 1      | 3     | 1       | 2       | 4    | 4     | A   | 4773.376    | 0.017              | 0.021               |
| 3    | 2      | 1      | 3     | 1       | 2       | 4    | 4     | E   | 4773.376    | 0.037              |                     |
| 3    | 2      | 1      | 3     | 1       | 2       | 3    | 3     | A   | 4773.495    | -0.009             | -0.005              |
| 3    | 2      | 1      | 3     | 1       | 2       | 3    | 3     | E   | 4773.495    | 0.010              |                     |
| 3    | 2      | 1      | 3     | 1       | 2       | 4    | 3     | A   | 4773.836    | -0.011             | -0.007              |
| 3    | 2      | 1      | 3     | 1       | 2       | 4    | 3     | E   | 4773.836    | 0.008              |                     |
| 3    | 2      | 1      | 3     | 1       | 2       | 2    | 3     | A   | 4773.958    | -0.009             | -0.005              |
| 3    | 2      | 1      | 3     | 1       | 2       | 2    | 3     | E   | 4773.958    | 0.010              |                     |
| 3    | 2      | 2      | 3     | 1       | 3       | 3    | 3     | A   | 6120.911    | -0.020             | -0.014              |
| 3    | 2      | 2      | 3     | 1       | 3       | 3    | 3     | E   | 6120.911    | 0.024              |                     |
| 3    | 2      | 2      | 3     | 1       | 3       | 4    | 4     | A   | 6122.554    | -0.023             | -0.017              |
| 3    | 2      | 2      | 3     | 1       | 3       | 4    | 4     | E   | 6122.554    | 0.020              |                     |
| 3    | 2      | 2      | 3     | 1       | 3       | 2    | 2     | A   | 6123.133    | -0.020             | -0.014              |
| 3    | 2      | 2      | 3     | 1       | 3       | 2    | 2     | E   | 6123.133    | 0.023              |                     |
| 4    | 0      | 4      | 3     | 0       | 3       | 3    | 3     | A   | 6307.874    | -0.003             | -0.001              |
| 4    | 0      | 4      | 3     | 0       | 3       | 3    | 3     | E   | 6307.874    | 0.001              |                     |
| 4    | 0      | 4      | 3     | 0       | 3       | 5    | 4     | A   | 6309.265    | -0.009             | -0.007              |
| 4    | 0      | 4      | 3     | 0       | 3       | 5    | 4     | E   | 6309.265    | -0.005             |                     |
| 4    | 0      | 4      | 3     | 0       | 3       | 4    | 3     | A   | 6309.541    | -0.003             | 0.000               |
| 4    | 0      | 4      | 3     | 0       | 3       | 4    | 3     | E   | 6309.541    | 0.002              |                     |
| 4    | 0      | 4      | 3     | 0       | 3       | 4    | 4     | A   | 6310.599    | 0.000              | 0.002               |
| 4    | 0      | 4      | 3     | 0       | 3       | 4    | 4     | E   | 6310.599    | 0.004              |                     |
| 4    | 1      | 4      | 3     | 1       | 3       | 3    | 3     | A   | 6007.384    | -0.003             | -0.001              |
| 4    | 1      | 4      | 3     | 1       | 3       | 3    | 3     | E   | 6007.384    | 0.000              |                     |
| 4    | 1      | 4      | 3     | 1       | 3       | 5    | 4     | A   | 6009.498    | -0.001             | 0.000               |
| 4    | 1      | 4      | 3     | 1       | 3       | 5    | 4     | E   | 6009.498    | 0.001              |                     |
| 4    | 1      | 4      | 3     | 1       | 3       | 3    | 2     | A   | 6009.606    | -0.003             | -0.001              |
| 4    | 1      | 4      | 3     | 1       | 3       | 3    | 2     | E   | 6009.606    | -0.001             |                     |
| 4    | 1      | 4      | 3     | 1       | 3       | 4    | 3     | A   | 6009.666    | -0.002             | 0.000               |
| 4    | 1      | 4      | 3     | 1       | 3       | 4    | 3     | E   | 6009.666    | 0.000              |                     |
| 4    | 1      | 4      | 3     | 1       | 3       | 4    | 4     | A   | 6011.309    | -0.005             | -0.003              |
| 4    | 1      | 4      | 3     | 1       | 3       | 4    | 4     | E   | 6011.309    | -0.003             |                     |
| 4    | 1      | 3      | 3     | 1       | 2       | 4    | 4     | A   | 6982.701    | -0.005             | -0.002              |
| 4    | 1      | 3      | 3     | 1       | 2       | 4    | 4     | E   | 6982.701    | 0.003              |                     |
| 4    | 1      | 3      | 3     | 1       | 2       | 3    | 2     | A   | 6982.964    | -0.006             | -0.002              |
| 4    | 1      | 3      | 3     | 1       | 2       | 3    | 2     | E   | 6982.964    | 0.002              |                     |
| 4    | 1      | 3      | 3     | 1       | 2       | 5    | 4     | A   | 6983.049    | -0.003             | 0.001               |
| 4    | 1      | 3      | 3     | 1       | 2       | 5    | 4     | E   | 6983.049    | 0.005              |                     |
| 4    | 1      | 3      | 3     | 1       | 2       | 4    | 3     | A   | 6983.190    | -0.004             | -0.001              |
| 4    | 1      | 3      | 3     | 1       | 2       | 4    | 3     | E   | 6983.190    | 0.004              |                     |
| 4    | 1      | 3      | 3     | 1       | 2       | 3    | 3     | A   | 6983.624    | -0.005             | -0.002              |
| 4    | 1      | 3      | 3     | 1       | 2       | 3    | 3     | E   | 6983.624    | 0.003              |                     |
| 4    | 2      | 3      | 3     | 2       | 2       | 3    | 2     | A   | 6527.267    | 0.001              | 0.004               |
| 4    | 2      | 3      | 3     | 2       | 2       | 3    | 2     | E   | 6527.267    | 0.001              |                     |
| 4    | 2      | 3      | 3     | 2       | 2       | 5    | 4     | A   | 6527.351    | 0.001              | 0.005               |
| 4    | 2      | 3      | 3     | 2       | 2       | 5    | 4     | E   | 6527.351    | 0.001              |                     |
| 4    | 2      | 3      | 3     | 2       | 2       | 4    | 3     | A   | 6527.675    | 0.000              | 0.004               |
| 4    | 2      | 3      | 3     | 2       | 2       | 4    | 3     | E   | 6527.675    | 0.000              |                     |
| 4    | 2      | 2      | 3     | 2       | 1       | 4    | 4     | A   | 6764.810    | -0.001             | 0.002               |
| 4    | 2      | 2      | 3     | 2       | 1       | 4    | 4     | E   | 6764.810    | 0.011              |                     |
| 4    | 2      | 2      | 3     | 2       | 1       | 3    | 2     | A   | 6765.067    | 0.036              | 0.039               |
| 4    | 2      | 2      | 3     | 2       | 1       | 3    | 2     | E   | 6765.067    | 0.048              |                     |

*Continued on next page*

Table S2 – *continued from previous page*

| $J'$ | $K'_a$ | $K'_c$ | $J''$ | $K''_a$ | $K''_c$ | $F'$ | $F''$ | Sym | $\nu_{obs}$ | $\Delta\nu_{XIAM}$ | $\Delta\nu_{SPFIT}$ |
|------|--------|--------|-------|---------|---------|------|-------|-----|-------------|--------------------|---------------------|
| 4    | 2      | 2      | 3     | 2       | 1       | 5    | 4     | A   | 6765.067    | -0.015             | -0.012              |
| 4    | 2      | 2      | 3     | 2       | 1       | 5    | 4     | E   | 6765.067    | -0.003             |                     |
| 4    | 2      | 2      | 3     | 2       | 1       | 4    | 3     | A   | 6765.151    | -0.003             | 0.000               |
| 4    | 2      | 2      | 3     | 2       | 1       | 4    | 3     | E   | 6765.151    | 0.009              |                     |
| 4    | 2      | 2      | 3     | 2       | 1       | 3    | 3     | A   | 6765.494    | -0.001             | 0.002               |
| 4    | 2      | 2      | 3     | 2       | 1       | 3    | 3     | E   | 6765.494    | 0.011              |                     |
| 4    | 3      | 2      | 3     | 3       | 1       | 3    | 2     | A   | 6592.670    | 0.003              | 0.007               |
| 4    | 3      | 2      | 3     | 3       | 1       | 5    | 4     | A   | 6592.907    | 0.005              |                     |
| 4    | 3      | 2      | 3     | 3       | 1       | 4    | 3     | A   | 6593.480    | 0.002              | 0.009               |
| 4    | 3      | 1      | 3     | 3       | 0       | 3    | 2     | A   | 6602.383    | 0.002              |                     |
| 4    | 3      | 1      | 3     | 3       | 0       | 5    | 4     | A   | 6602.612    | 0.001              | 0.006               |
| 4    | 3      | 1      | 3     | 3       | 0       | 4    | 3     | A   | 6603.166    | 0.001              |                     |
| 4    | 1      | 3      | 4     | 1       | 4       | 4    | 4     | A   | 2445.107    | -0.009             | 0.005               |
| 4    | 1      | 3      | 4     | 1       | 4       | 4    | 4     | E   | 2445.107    | 0.004              |                     |
| 4    | 1      | 3      | 4     | 1       | 4       | 5    | 5     | A   | 2447.268    | -0.009             | 0.005               |
| 4    | 1      | 3      | 4     | 1       | 4       | 5    | 5     | E   | 2447.268    | 0.004              |                     |
| 4    | 1      | 3      | 4     | 1       | 4       | 3    | 3     | A   | 2447.838    | 0.006              | 0.004               |
| 4    | 1      | 3      | 4     | 1       | 4       | 3    | 3     | E   | 2447.838    | 0.019              |                     |
| 4    | 0      | 4      | 3     | 1       | 3       | 3    | 3     | A   | 5145.549    | 0.001              | -0.006              |
| 4    | 0      | 4      | 3     | 1       | 3       | 3    | 3     | E   | 5145.549    | -0.002             |                     |
| 4    | 0      | 4      | 3     | 1       | 3       | 4    | 3     | A   | 5147.214    | 0.000              | -0.006              |
| 4    | 0      | 4      | 3     | 1       | 3       | 4    | 3     | E   | 5147.214    | -0.003             |                     |
| 4    | 0      | 4      | 3     | 1       | 3       | 5    | 4     | A   | 5147.535    | 0.000              | 0.009               |
| 4    | 0      | 4      | 3     | 1       | 3       | 5    | 4     | E   | 5147.535    | -0.003             |                     |
| 4    | 0      | 4      | 3     | 1       | 3       | 3    | 2     | A   | 5147.772    | 0.002              | 0.002               |
| 4    | 0      | 4      | 3     | 1       | 3       | 3    | 2     | E   | 5147.772    | -0.001             |                     |
| 4    | 0      | 4      | 3     | 1       | 3       | 4    | 4     | A   | 5148.858    | -0.003             | 0.001               |
| 4    | 0      | 4      | 3     | 1       | 3       | 4    | 4     | E   | 5148.858    | -0.005             |                     |
| 4    | 1      | 4      | 3     | 0       | 3       | 3    | 3     | A   | 7169.712    | -0.004             | 0.001               |
| 4    | 1      | 4      | 3     | 0       | 3       | 3    | 3     | E   | 7169.712    | 0.006              |                     |
| 4    | 1      | 4      | 3     | 0       | 3       | 3    | 2     | A   | 7171.136    | -0.005             | 0.003               |
| 4    | 1      | 4      | 3     | 0       | 3       | 3    | 2     | E   | 7171.136    | 0.004              |                     |
| 4    | 1      | 4      | 3     | 0       | 3       | 5    | 4     | A   | 7171.233    | -0.005             | -0.001              |
| 4    | 1      | 4      | 3     | 0       | 3       | 5    | 4     | E   | 7171.233    | 0.004              |                     |
| 4    | 1      | 4      | 3     | 0       | 3       | 4    | 3     | A   | 7171.991    | -0.006             | -0.001              |
| 4    | 1      | 4      | 3     | 0       | 3       | 4    | 3     | E   | 7171.991    | 0.003              |                     |
| 4    | 1      | 4      | 3     | 0       | 3       | 4    | 4     | A   | 7173.043    | -0.010             | -0.002              |
| 4    | 1      | 4      | 3     | 0       | 3       | 4    | 4     | E   | 7173.043    | -0.001             |                     |
| 4    | 1      | 3      | 4     | 0       | 4       | 4    | 4     | A   | 3307.562    | -0.008             | -0.003              |
| 4    | 1      | 3      | 4     | 0       | 4       | 4    | 4     | E   | 3307.562    | 0.011              |                     |
| 4    | 1      | 3      | 4     | 0       | 4       | 5    | 5     | A   | 3309.231    | -0.010             | -0.004              |
| 4    | 1      | 3      | 4     | 0       | 4       | 5    | 5     | E   | 3309.231    | 0.008              |                     |
| 4    | 1      | 3      | 4     | 0       | 4       | 3    | 3     | A   | 3309.662    | -0.009             | -0.007              |
| 4    | 1      | 3      | 4     | 0       | 4       | 3    | 3     | E   | 3309.662    | 0.009              |                     |
| 4    | 2      | 3      | 4     | 1       | 4       | 4    | 4     | A   | 6638.919    | -0.019             | -0.004              |
| 4    | 2      | 3      | 4     | 1       | 4       | 4    | 4     | E   | 6638.919    | 0.022              |                     |
| 4    | 2      | 3      | 4     | 1       | 4       | 5    | 5     | A   | 6640.408    | -0.019             | -0.006              |
| 4    | 2      | 3      | 4     | 1       | 4       | 5    | 5     | E   | 6640.408    | 0.021              |                     |
| 4    | 2      | 3      | 4     | 1       | 4       | 3    | 3     | A   | 6640.795    | -0.015             | -0.005              |
| 4    | 2      | 3      | 4     | 1       | 4       | 3    | 3     | E   | 6640.795    | 0.025              |                     |
| 4    | 2      | 2      | 4     | 1       | 3       | 3    | 3     | A   | 4555.361    | -0.009             | -0.011              |
| 4    | 2      | 2      | 4     | 1       | 3       | 5    | 5     | A   | 4555.419    | 0.030              |                     |
| 4    | 2      | 2      | 4     | 1       | 3       | 5    | 5     | E   | 4555.361    | -0.005             | -0.011              |
| 4    | 2      | 2      | 4     | 1       | 3       | 4    | 4     | A   | 4555.474    | 0.009              |                     |
| 4    | 2      | 2      | 4     | 1       | 3       | 4    | 4     | E   | 4555.419    | -0.022             | -0.008              |
| 5    | 0      | 5      | 4     | 0       | 4       | 4    | 4     | A   | 7741.938    | -0.002             |                     |
| 5    | 0      | 5      | 4     | 0       | 4       | 4    | 4     | E   | 7741.938    | 0.003              | -0.005              |

*Continued on next page*

Table S2 – *continued from previous page*

| $J'$ | $K'_a$ | $K'_c$ | $J''$ | $K''_a$ | $K''_c$ | $F'$ | $F''$ | Sym | $\nu_{obs}$ | $\Delta\nu_{XIAM}$ | $\Delta\nu_{SPFIT}$ |
|------|--------|--------|-------|---------|---------|------|-------|-----|-------------|--------------------|---------------------|
| 5    | 0      | 5      | 4     | 0       | 4       | 6    | 5     | A   | 7743.590    | 0.000              |                     |
| 5    | 0      | 5      | 4     | 0       | 4       | 6    | 5     | E   | 7743.590    | 0.004              | 0.034               |
| 5    | 0      | 5      | 4     | 0       | 4       | 4    | 3     | A   | 7743.590    | -0.016             |                     |
| 5    | 0      | 5      | 4     | 0       | 4       | 4    | 3     | E   | 7743.590    | -0.011             | 0.014               |
| 5    | 0      | 5      | 4     | 0       | 4       | 5    | 4     | A   | 7743.859    | -0.003             |                     |
| 5    | 0      | 5      | 4     | 0       | 4       | 5    | 4     | E   | 7743.859    | 0.002              | -0.003              |
| 5    | 0      | 5      | 4     | 0       | 4       | 5    | 5     | A   | 7745.190    | 0.003              |                     |
| 5    | 0      | 5      | 4     | 0       | 4       | 5    | 5     | E   | 7745.190    | 0.007              | 0.000               |
| 5    | 1      | 5      | 4     | 1       | 4       | 4    | 4     | A   | 7472.427    | 0.005              |                     |
| 5    | 1      | 5      | 4     | 1       | 4       | 4    | 4     | E   | 7472.427    | 0.008              | -0.017              |
| 5    | 1      | 5      | 4     | 1       | 4       | 6    | 5     | A   | 7474.636    | 0.003              |                     |
| 5    | 1      | 5      | 4     | 1       | 4       | 6    | 5     | E   | 7474.636    | 0.006              | -0.004              |
| 5    | 1      | 5      | 4     | 1       | 4       | 4    | 3     | A   | 7474.713    | 0.010              |                     |
| 5    | 1      | 5      | 4     | 1       | 4       | 4    | 3     | E   | 7474.713    | 0.013              | 0.002               |
| 5    | 1      | 5      | 4     | 1       | 4       | 5    | 4     | A   | 7474.765    | -0.001             |                     |
| 5    | 1      | 5      | 4     | 1       | 4       | 5    | 4     | E   | 7474.765    | 0.002              | 0.005               |
| 5    | 1      | 5      | 4     | 1       | 4       | 5    | 5     | A   | 7476.590    | 0.009              |                     |
| 5    | 1      | 5      | 4     | 1       | 4       | 5    | 5     | E   | 7476.590    | 0.012              | 0.002               |
| 5    | 2      | 4      | 4     | 2       | 3       | 6    | 5     | A   | 8127.821    | 0.009              |                     |
| 5    | 2      | 4      | 4     | 2       | 3       | 6    | 5     | E   | 8127.821    | 0.014              | 0.010               |
| 5    | 2      | 4      | 4     | 2       | 3       | 4    | 3     | A   | 8127.821    | 0.034              |                     |
| 5    | 2      | 4      | 4     | 2       | 3       | 5    | 4     | E   | 8128.023    | 0.009              | -0.001              |
| 5    | 0      | 5      | 4     | 1       | 4       | 4    | 4     | A   | 6879.494    | 0.008              |                     |
| 5    | 0      | 5      | 4     | 1       | 4       | 4    | 4     | E   | 6879.494    | 0.008              | 0.009               |
| 5    | 0      | 5      | 4     | 1       | 4       | 5    | 4     | A   | 6881.409    | 0.001              |                     |
| 5    | 0      | 5      | 4     | 1       | 4       | 5    | 4     | E   | 6881.409    | 0.000              | 0.009               |
| 5    | 0      | 5      | 4     | 1       | 4       | 6    | 5     | A   | 6881.628    | 0.002              |                     |
| 5    | 0      | 5      | 4     | 1       | 4       | 6    | 5     | E   | 6881.628    | 0.001              | 0.035               |
| 5    | 0      | 5      | 4     | 1       | 4       | 4    | 3     | A   | 6881.770    | 0.003              |                     |
| 5    | 0      | 5      | 4     | 1       | 4       | 4    | 3     | E   | 6881.770    | 0.002              | 0.006               |
| 5    | 0      | 5      | 4     | 1       | 4       | 5    | 5     | A   | 6883.228    | 0.005              |                     |
| 5    | 0      | 5      | 4     | 1       | 4       | 5    | 5     | E   | 6883.228    | 0.004              | -0.001              |
| 5    | 1      | 5      | 4     | 0       | 4       | 4    | 3     | A   | 8336.580    | 0.039              |                     |
| 5    | 1      | 5      | 4     | 0       | 4       | 4    | 3     | E   | 8336.580    | 0.047              | 0.001               |
| 5    | 1      | 5      | 4     | 0       | 4       | 6    | 5     | A   | 8336.580    | -0.017             |                     |
| 5    | 1      | 5      | 4     | 0       | 4       | 6    | 5     | E   | 8336.580    | -0.009             | 0.001               |
| 5    | 1      | 5      | 4     | 0       | 4       | 5    | 4     | A   | 8337.214    | -0.006             |                     |
| 5    | 1      | 5      | 4     | 0       | 4       | 5    | 4     | E   | 8337.214    | 0.002              | 0.004               |
| 5    | 1      | 4      | 4     | 2       | 3       | 5    | 4     | A   | 4476.536    | 0.006              |                     |
| 5    | 1      | 4      | 4     | 2       | 3       | 5    | 4     | E   | 4476.536    | -0.012             | 0.039               |
| 5    | 1      | 4      | 4     | 2       | 3       | 6    | 5     | A   | 4477.060    | 0.006              |                     |
| 5    | 1      | 4      | 4     | 2       | 3       | 6    | 5     | E   | 4477.060    | -0.012             | -0.017              |
| 5    | 1      | 4      | 4     | 2       | 3       | 4    | 3     | A   | 4477.183    | 0.005              |                     |
| 5    | 1      | 4      | 4     | 2       | 3       | 4    | 3     | E   | 4477.183    | -0.013             | -0.006              |
| 5    | 1      | 4      | 5     | 0       | 5       | 5    | 5     | A   | 4234.071    | 0.012              |                     |
| 5    | 1      | 4      | 5     | 0       | 5       | 5    | 5     | E   | 4234.026    | -0.010             | 0.002               |
| 5    | 1      | 4      | 5     | 0       | 5       | 6    | 6     | A   | 4235.855    | -0.001             |                     |
| 5    | 1      | 4      | 5     | 0       | 5       | 6    | 6     | E   | 4235.824    | -0.008             | 0.002               |
| 5    | 1      | 4      | 5     | 0       | 5       | 4    | 4     | A   | 4236.227    | 0.006              |                     |
| 5    | 1      | 4      | 5     | 0       | 5       | 4    | 4     | E   | 4236.191    | -0.007             | 0.002               |
| 5    | 2      | 4      | 5     | 1       | 5       | 5    | 5     | A   | 7292.178    | -0.012             |                     |
| 5    | 2      | 4      | 5     | 1       | 5       | 5    | 5     | E   | 7292.178    | 0.030              | 0.017               |
| 5    | 2      | 4      | 5     | 1       | 5       | 6    | 6     | A   | 7293.591    | -0.015             |                     |
| 5    | 2      | 4      | 5     | 1       | 5       | 6    | 6     | E   | 7293.591    | 0.027              | 0.005               |
| 5    | 2      | 4      | 5     | 1       | 5       | 4    | 4     | A   | 7293.883    | -0.012             |                     |
| 5    | 2      | 4      | 5     | 1       | 5       | 4    | 4     | E   | 7293.883    | 0.031              | 0.012               |
| 5    | 2      | 3      | 5     | 1       | 4       | 5    | 5     | A   | 4452.466    | 0.004              |                     |

*Continued on next page*



Table S2 – *continued from previous page*

| $J'$ | $K'_a$ | $K'_c$ | $J''$ | $K''_a$ | $K''_c$ | $F'$ | $F''$ | Sym | $\nu_{obs}$ | $\Delta\nu_{XIAM}$ | $\Delta\nu_{SPFIT}$ |
|------|--------|--------|-------|---------|---------|------|-------|-----|-------------|--------------------|---------------------|
| 5    | 2      | 3      | 5     | 1       | 4       | 5    | 5     | E   | 4452.431    | -0.006             | -0.004              |
| 5    | 2      | 3      | 5     | 1       | 4       | 6    | 6     | A   | 4452.587    | 0.001              |                     |
| 5    | 2      | 3      | 5     | 1       | 4       | 6    | 6     | E   | 4452.548    | -0.013             | -0.007              |
| 5    | 2      | 3      | 5     | 1       | 4       | 4    | 4     | A   | 4452.587    | -0.024             |                     |
| 5    | 2      | 3      | 5     | 1       | 4       | 4    | 4     | E   | 4452.587    | 0.000              | -0.003              |
| 6    | 1      | 5      | 5     | 2       | 4       | 6    | 5     | A   | 6658.710    | 0.006              |                     |
| 6    | 1      | 5      | 5     | 2       | 4       | 6    | 5     | E   | 6658.710    | -0.006             | 0.009               |
| 6    | 1      | 5      | 5     | 2       | 4       | 7    | 6     | A   | 6659.266    | 0.004              |                     |
| 6    | 1      | 5      | 5     | 2       | 4       | 7    | 6     | E   | 6659.266    | -0.008             | 0.006               |
| 6    | 1      | 5      | 5     | 2       | 4       | 5    | 4     | A   | 6659.376    | 0.001              |                     |
| 6    | 1      | 5      | 5     | 2       | 4       | 5    | 4     | E   | 6659.376    | -0.011             | -0.019              |
| 6    | 1      | 5      | 6     | 0       | 6       | 6    | 6     | A   | 5411.257    | 0.003              |                     |
| 6    | 1      | 5      | 6     | 0       | 6       | 7    | 7     | A   | 5413.124    | 0.007              | -0.001              |
| 6    | 1      | 5      | 6     | 0       | 6       | 5    | 5     | A   | 5413.437    | 0.006              |                     |
| 6    | 2      | 4      | 6     | 1       | 5       | 7    | 7     | A   | 4535.261    | -0.012             | -0.003              |
| 6    | 2      | 4      | 6     | 1       | 5       | 7    | 7     | E   | 4535.261    | 0.014              |                     |
| 6    | 2      | 4      | 6     | 1       | 5       | 5    | 5     | A   | 4535.310    | -0.024             | -0.005              |
| 6    | 2      | 4      | 6     | 1       | 5       | 5    | 5     | E   | 4535.310    | 0.001              |                     |
| 7    | 1      | 6      | 7     | 0       | 7       | 7    | 7     | A   | 6797.324    | -0.022             | 0.010               |
| 7    | 1      | 6      | 7     | 0       | 7       | 7    | 7     | E   | 6797.324    | 0.015              |                     |
| 7    | 1      | 6      | 7     | 0       | 7       | 8    | 8     | A   | 6799.168    | -0.027             | 0.014               |
| 7    | 1      | 6      | 7     | 0       | 7       | 8    | 8     | E   | 6799.168    | 0.011              |                     |
| 7    | 1      | 6      | 7     | 0       | 7       | 6    | 6     | A   | 6799.444    | -0.017             | 0.013               |
| 7    | 1      | 6      | 7     | 0       | 7       | 6    | 6     | E   | 6799.444    | 0.020              |                     |
| 7    | 2      | 5      | 7     | 1       | 6       | 7    | 7     | A   | 4857.000    | -0.018             | -0.006              |
| 7    | 2      | 5      | 7     | 1       | 6       | 7    | 7     | E   | 4857.000    | 0.009              |                     |
| 7    | 2      | 5      | 7     | 1       | 6       | 8    | 8     | A   | 4857.618    | -0.010             | -0.019              |
| 7    | 2      | 5      | 7     | 1       | 6       | 8    | 8     | E   | 4857.618    | 0.017              |                     |
| 7    | 2      | 5      | 7     | 1       | 6       | 6    | 6     | A   | 4857.692    | -0.024             | -0.013              |
| 7    | 2      | 5      | 7     | 1       | 6       | 6    | 6     | E   | 4857.692    | 0.003              |                     |
| 8    | 2      | 6      | 8     | 1       | 7       | 8    | 8     | A   | 5458.481    | 0.011              | -0.018              |
| 8    | 2      | 6      | 8     | 1       | 7       | 9    | 9     | A   | 5459.304    | -0.005             | -0.008              |
| 8    | 2      | 6      | 8     | 1       | 7       | 7    | 7     | A   | 5459.421    | 0.007              | -0.012              |
| 12   | 12     | 0      | 11    | 11      | 0       | 12   | 11    | E   | 60812.530   | 0.196              |                     |
| 12   | 12     | 0      | 11    | 11      | 1       | 12   | 11    | A   | 60812.060   | -0.029             | -0.003              |
| 12   | 12     | 1      | 11    | 11      | 0       | 12   | 11    | A   | 60812.060   | -0.029             | -0.017              |
| 12   | 12     | 1      | 11    | 11      | 1       | 12   | 11    | E   | 60811.210   | -0.133             |                     |
| 13   | 12     | 2      | 12    | 11      | 1       | 13   | 12    | A   | 62457.070   | -0.051             | 0.019               |
| 13   | 12     | 1      | 12    | 11      | 2       | 13   | 12    | A   | 62457.070   | -0.051             | 0.003               |
| 14   | 12     | 2      | 13    | 11      | 2       | 14   | 13    | E   | 64101.990   | -0.047             |                     |
| 14   | 12     | 3      | 13    | 11      | 2       | 14   | 13    | A   | 64101.840   | 0.045              | 0.015               |
| 14   | 12     | 2      | 13    | 11      | 3       | 14   | 13    | A   | 64101.840   | 0.045              | -0.003              |
| 14   | 12     | 3      | 13    | 11      | 3       | 14   | 13    | E   | 64101.080   | 0.033              |                     |
| 14   | 11     | 3      | 13    | 10      | 3       | 14   | 13    | E   | 60529.360   | -0.088             |                     |
| 14   | 11     | 3      | 13    | 10      | 4       | 14   | 13    | A   | 60529.150   | -0.033             | -0.003              |
| 14   | 11     | 4      | 13    | 10      | 3       | 14   | 13    | A   | 60529.150   | -0.033             | -0.036              |
| 14   | 11     | 4      | 13    | 10      | 4       | 14   | 13    | E   | 60528.390   | -0.061             |                     |
| 15   | 12     | 4      | 14    | 11      | 3       | 15   | 14    | A   | 65745.900   | 0.057              | -0.036              |
| 15   | 12     | 3      | 14    | 11      | 4       | 15   | 14    | A   | 65745.900   | 0.057              | 0.045               |
| 15   | 11     | 4      | 14    | 10      | 5       | 15   | 14    | A   | 62171.860   | 0.023              | 0.045               |
| 15   | 11     | 5      | 14    | 10      | 4       | 15   | 14    | A   | 62171.860   | 0.023              | -0.044              |
| 15   | 11     | 5      | 14    | 10      | 5       | 15   | 14    | E   | 62171.100   | -0.005             |                     |
| 16   | 11     | 5      | 15    | 10      | 6       | 16   | 15    | A   | 63812.970   | 0.052              | -0.044              |
| 16   | 11     | 6      | 15    | 10      | 5       | 16   | 15    | A   | 63812.970   | 0.052              | 0.037               |
| 16   | 11     | 6      | 15    | 10      | 6       | 16   | 15    | E   | 63812.170   | -0.015             |                     |
| 16   | 10     | 6      | 15    | 9       | 6       | 16   | 15    | E   | 60232.020   | 0.041              |                     |
| 16   | 10     | 6      | 15    | 9       | 7       | 16   | 15    | A   | 60231.750   | 0.057              | 0.037               |

*Continued on next page*

Table S2 – *continued from previous page*

| $J'$ | $K'_a$ | $K'_c$ | $J''$ | $K''_a$ | $K''_c$ | $F'$ | $F''$ | Sym | $\nu_{obs}$ | $\Delta\nu_{XIAM}$ | $\Delta\nu_{SPFIT}$ |
|------|--------|--------|-------|---------|---------|------|-------|-----|-------------|--------------------|---------------------|
| 16   | 10     | 7      | 15    | 9       | 6       | 16   | 15    | A   | 60231.750   | 0.059              | -0.010              |
| 16   | 10     | 7      | 15    | 9       | 7       | 16   | 15    | E   | 60230.960   | -0.015             |                     |
| 17   | 10     | 7      | 16    | 9       | 7       | 17   | 16    | E   | 61865.950   | -0.070             |                     |
| 17   | 10     | 7      | 16    | 9       | 8       | 17   | 16    | A   | 61865.700   | -0.038             | -0.010              |
| 17   | 10     | 8      | 16    | 9       | 7       | 17   | 16    | A   | 61865.700   | -0.031             | -0.006              |
| 17   | 10     | 8      | 16    | 9       | 8       | 17   | 16    | E   | 61864.960   | -0.056             |                     |

Table S3: Experimental rotational transition frequencies of 3'(E)-aminoacetophenone ( $\nu$ /MHz,  $\Delta\nu = \nu_{obs} - \nu_{calc}$ ).

| $J'$ | $K'_a$ | $K'_c$ | $J''$ | $K''_a$ | $K''_c$ | $F'$ | $F''$ | $\nu_{obs}$ | $\Delta\nu$ |
|------|--------|--------|-------|---------|---------|------|-------|-------------|-------------|
| 1    | 1      | 1      | 0     | 0       | 0       | 0    | 1     | 3219.925    | -0.002      |
| 1    | 1      | 1      | 0     | 0       | 0       | 2    | 1     | 3220.881    | -0.002      |
| 1    | 1      | 1      | 0     | 0       | 0       | 1    | 1     | 3221.518    | -0.003      |
| 2    | 0      | 2      | 1     | 0       | 1       | 1    | 1     | 3269.015    | 0.001       |
| 2    | 0      | 2      | 1     | 0       | 1       | 3    | 2     | 3270.113    | 0.000       |
| 2    | 0      | 2      | 1     | 0       | 1       | 2    | 1     | 3270.306    | -0.001      |
| 2    | 0      | 2      | 1     | 0       | 1       | 1    | 0     | 3270.606    | -0.002      |
| 2    | 0      | 2      | 1     | 0       | 1       | 2    | 2     | 3270.942    | -0.002      |
| 2    | 1      | 2      | 1     | 1       | 1       | 1    | 1     | 3040.196    | -0.004      |
| 2    | 1      | 2      | 1     | 1       | 1       | 3    | 2     | 3041.594    | -0.002      |
| 2    | 1      | 2      | 1     | 1       | 1       | 1    | 0     | 3041.789    | -0.004      |
| 2    | 1      | 2      | 1     | 1       | 1       | 2    | 1     | 3042.322    | -0.003      |
| 2    | 1      | 2      | 1     | 1       | 1       | 2    | 2     | 3042.963    | 0.001       |
| 2    | 1      | 1      | 1     | 1       | 0       | 1    | 0     | 3555.263    | -0.001      |
| 2    | 1      | 1      | 1     | 1       | 0       | 2    | 2     | 3556.115    | 0.001       |
| 2    | 1      | 1      | 1     | 1       | 0       | 3    | 2     | 3556.798    | 0.001       |
| 2    | 1      | 1      | 1     | 1       | 0       | 2    | 1     | 3557.387    | -0.002      |
| 2    | 1      | 1      | 1     | 1       | 0       | 1    | 1     | 3558.454    | 0.002       |
| 2    | 1      | 2      | 1     | 0       | 1       | 1    | 1     | 4611.524    | -0.002      |
| 2    | 1      | 2      | 1     | 0       | 1       | 3    | 2     | 4612.919    | -0.004      |
| 2    | 1      | 2      | 1     | 0       | 1       | 1    | 0     | 4613.114    | -0.006      |
| 2    | 1      | 2      | 1     | 0       | 1       | 2    | 1     | 4613.649    | -0.003      |
| 2    | 1      | 2      | 1     | 0       | 1       | 2    | 2     | 4614.284    | -0.005      |
| 2    | 1      | 1      | 2     | 0       | 2       | 3    | 3     | 2115.858    | -0.003      |
| 2    | 2      | 0      | 2     | 1       | 1       | 2    | 1     | 4741.931    | -0.002      |
| 2    | 2      | 0      | 2     | 1       | 1       | 2    | 3     | 4742.308    | -0.006      |
| 2    | 2      | 0      | 2     | 1       | 1       | 2    | 2     | 4742.995    | -0.002      |
| 2    | 2      | 0      | 2     | 1       | 1       | 3    | 3     | 4743.142    | -0.003      |
| 2    | 2      | 0      | 2     | 1       | 1       | 1    | 1     | 4743.226    | 0.000       |
| 2    | 2      | 0      | 2     | 1       | 1       | 3    | 2     | 4743.827    | -0.001      |
| 2    | 2      | 0      | 2     | 1       | 1       | 1    | 2     | 4744.289    | -0.001      |
| 2    | 2      | 1      | 2     | 1       | 2       | 2    | 2     | 5484.980    | -0.001      |
| 2    | 2      | 1      | 2     | 1       | 2       | 3    | 2     | 5485.659    | -0.005      |
| 2    | 2      | 1      | 2     | 1       | 2       | 1    | 2     | 5486.047    | 0.004       |
| 2    | 2      | 1      | 2     | 1       | 2       | 2    | 3     | 5486.346    | -0.001      |
| 2    | 2      | 1      | 2     | 1       | 2       | 3    | 3     | 5487.026    | -0.004      |
| 2    | 2      | 1      | 2     | 1       | 2       | 2    | 1     | 5487.106    | 0.000       |
| 2    | 2      | 1      | 2     | 1       | 2       | 1    | 1     | 5488.167    | -0.001      |
| 3    | 0      | 3      | 2     | 0       | 2       | 2    | 2     | 4833.551    | -0.002      |
| 3    | 0      | 3      | 2     | 0       | 2       | 4    | 3     | 4834.760    | -0.002      |
| 3    | 0      | 3      | 2     | 0       | 2       | 2    | 1     | 4834.843    | -0.002      |
| 3    | 0      | 3      | 2     | 0       | 2       | 3    | 2     | 4835.008    | -0.003      |
| 3    | 0      | 3      | 2     | 0       | 2       | 3    | 3     | 4835.838    | -0.004      |
| 3    | 1      | 3      | 2     | 1       | 2       | 2    | 2     | 4543.359    | -0.002      |
| 3    | 1      | 3      | 2     | 1       | 2       | 4    | 3     | 4545.297    | -0.003      |
| 3    | 1      | 3      | 2     | 1       | 2       | 2    | 1     | 4545.485    | -0.001      |

*Continued on next page*

Table S3 – *continued from previous page*

| $J'$ | $K'_a$ | $K'_c$ | $J''$ | $K''_a$ | $K''_c$ | $F'$ | $F''$ | $\nu$    | $\Delta\nu$ |
|------|--------|--------|-------|---------|---------|------|-------|----------|-------------|
| 3    | 1      | 3      | 2     | 1       | 2       | 3    | 2     | 4545.568 | -0.004      |
| 3    | 1      | 3      | 2     | 1       | 2       | 3    | 3     | 4546.934 | -0.005      |
| 3    | 1      | 2      | 2     | 1       | 1       | 3    | 3     | 5315.415 | -0.001      |
| 3    | 1      | 2      | 2     | 1       | 1       | 2    | 1     | 5315.683 | 0.001       |
| 3    | 1      | 2      | 2     | 1       | 1       | 4    | 3     | 5315.895 | 0.001       |
| 3    | 1      | 2      | 2     | 1       | 1       | 3    | 2     | 5316.099 | 0.000       |
| 3    | 1      | 2      | 2     | 1       | 1       | 2    | 2     | 5316.745 | -0.001      |
| 3    | 2      | 2      | 2     | 2       | 1       | 2    | 1     | 4948.457 | 0.001       |
| 3    | 2      | 2      | 2     | 2       | 1       | 4    | 3     | 4948.837 | 0.002       |
| 3    | 2      | 2      | 2     | 2       | 1       | 3    | 2     | 4949.520 | 0.001       |
| 3    | 2      | 1      | 2     | 2       | 0       | 2    | 1     | 5062.701 | -0.003      |
| 3    | 2      | 1      | 2     | 2       | 0       | 4    | 3     | 5063.034 | -0.001      |
| 3    | 2      | 1      | 2     | 2       | 0       | 3    | 2     | 5063.493 | -0.002      |
| 3    | 2      | 1      | 2     | 2       | 0       | 2    | 2     | 5063.997 | 0.000       |
| 3    | 0      | 3      | 2     | 1       | 2       | 2    | 2     | 3490.207 | -0.001      |
| 3    | 0      | 3      | 2     | 1       | 2       | 3    | 2     | 3491.667 | 0.001       |
| 3    | 0      | 3      | 2     | 1       | 2       | 4    | 3     | 3491.952 | 0.000       |
| 3    | 0      | 3      | 2     | 1       | 2       | 2    | 1     | 3492.334 | 0.001       |
| 3    | 0      | 3      | 2     | 1       | 2       | 3    | 3     | 3493.036 | 0.004       |
| 3    | 1      | 3      | 2     | 0       | 2       | 2    | 2     | 5886.700 | -0.005      |
| 3    | 1      | 3      | 2     | 0       | 2       | 2    | 1     | 5887.992 | -0.006      |
| 3    | 1      | 3      | 2     | 0       | 2       | 4    | 3     | 5888.104 | -0.006      |
| 3    | 1      | 3      | 2     | 0       | 2       | 3    | 2     | 5888.907 | -0.010      |
| 3    | 1      | 2      | 3     | 0       | 3       | 3    | 3     | 2595.439 | 0.004       |
| 3    | 1      | 2      | 3     | 0       | 3       | 4    | 4     | 2596.995 | 0.001       |
| 3    | 1      | 2      | 3     | 0       | 3       | 2    | 2     | 2597.546 | 0.006       |
| 3    | 2      | 1      | 3     | 1       | 2       | 4    | 4     | 4490.277 | -0.009      |
| 3    | 2      | 1      | 3     | 1       | 2       | 3    | 3     | 4490.389 | -0.004      |
| 3    | 2      | 2      | 3     | 1       | 3       | 4    | 4     | 5890.566 | 0.001       |
| 3    | 2      | 2      | 3     | 1       | 3       | 2    | 2     | 5891.139 | 0.000       |
| 4    | 0      | 4      | 3     | 0       | 3       | 3    | 3     | 6325.770 | -0.004      |
| 4    | 0      | 4      | 3     | 0       | 3       | 5    | 4     | 6327.194 | -0.012      |
| 4    | 0      | 4      | 3     | 0       | 3       | 4    | 3     | 6327.488 | -0.001      |
| 4    | 0      | 4      | 3     | 0       | 3       | 4    | 4     | 6328.564 | -0.005      |
| 4    | 1      | 4      | 3     | 1       | 3       | 3    | 3     | 6028.854 | -0.002      |
| 4    | 1      | 4      | 3     | 1       | 3       | 5    | 4     | 6030.959 | -0.001      |
| 4    | 1      | 4      | 3     | 1       | 3       | 3    | 2     | 6031.067 | 0.000       |
| 4    | 1      | 4      | 3     | 1       | 3       | 4    | 3     | 6031.132 | 0.000       |
| 4    | 1      | 4      | 3     | 1       | 3       | 4    | 4     | 6032.767 | -0.004      |
| 4    | 1      | 3      | 3     | 1       | 2       | 4    | 4     | 7048.449 | -0.002      |
| 4    | 1      | 3      | 3     | 1       | 2       | 3    | 2     | 7048.695 | -0.001      |
| 4    | 1      | 3      | 3     | 1       | 2       | 5    | 4     | 7048.782 | 0.002       |
| 4    | 1      | 3      | 3     | 1       | 2       | 4    | 3     | 7048.932 | 0.002       |
| 4    | 1      | 3      | 3     | 1       | 2       | 3    | 3     | 7049.340 | -0.003      |
| 4    | 2      | 3      | 3     | 2       | 2       | 3    | 2     | 6575.746 | 0.001       |
| 4    | 2      | 3      | 3     | 2       | 2       | 5    | 4     | 6575.832 | 0.003       |
| 4    | 2      | 2      | 3     | 2       | 1       | 4    | 4     | 6846.828 | 0.008       |
| 4    | 2      | 2      | 3     | 2       | 1       | 3    | 2     | 6847.135 | -0.001      |
| 4    | 2      | 2      | 3     | 2       | 1       | 5    | 4     | 6847.135 | -0.001      |
| 4    | 2      | 2      | 3     | 2       | 1       | 4    | 3     | 6847.135 | -0.001      |
| 4    | 2      | 2      | 3     | 2       | 1       | 3    | 3     | 6847.598 | 0.013       |
| 4    | 3      | 2      | 3     | 3       | 1       | 3    | 2     | 6650.844 | 0.014       |
| 4    | 3      | 2      | 3     | 3       | 1       | 5    | 4     | 6651.070 | 0.008       |
| 4    | 3      | 2      | 3     | 3       | 1       | 4    | 3     | 6651.639 | 0.009       |
| 4    | 3      | 1      | 3     | 3       | 0       | 3    | 2     | 6663.197 | 0.004       |
| 4    | 3      | 1      | 3     | 3       | 0       | 5    | 4     | 6663.421 | 0.002       |
| 4    | 3      | 1      | 3     | 3       | 0       | 4    | 3     | 6663.960 | -0.001      |

*Continued on next page*

Table S3 – *continued from previous page*

| $J'$ | $K'_a$ | $K'_c$ | $J''$ | $K''_a$ | $K''_c$ | $F'$ | $F''$ | $\nu$    | $\Delta\nu$ |
|------|--------|--------|-------|---------|---------|------|-------|----------|-------------|
| 4    | 0      | 4      | 3     | 1       | 3       | 3    | 3     | 5271.868 | 0.000       |
| 4    | 0      | 4      | 3     | 1       | 3       | 4    | 3     | 5273.583 | 0.000       |
| 4    | 0      | 4      | 3     | 1       | 3       | 5    | 4     | 5273.857 | -0.001      |
| 4    | 0      | 4      | 3     | 1       | 3       | 3    | 2     | 5274.079 | -0.001      |
| 4    | 0      | 4      | 3     | 1       | 3       | 4    | 4     | 5275.220 | -0.001      |
| 4    | 1      | 4      | 3     | 0       | 3       | 3    | 3     | 7082.771 | 0.009       |
| 4    | 1      | 4      | 3     | 0       | 3       | 4    | 4     | 7086.117 | -0.002      |
| 4    | 1      | 4      | 3     | 0       | 3       | 3    | 2     | 7084.214 | -0.006      |
| 4    | 1      | 4      | 3     | 0       | 3       | 5    | 4     | 7084.304 | -0.004      |
| 4    | 1      | 4      | 3     | 0       | 3       | 4    | 3     | 7085.034 | -0.005      |
| 4    | 1      | 3      | 4     | 0       | 4       | 4    | 4     | 3316.882 | 0.006       |
| 4    | 1      | 3      | 4     | 0       | 4       | 5    | 5     | 3318.570 | 0.002       |
| 4    | 1      | 3      | 4     | 0       | 4       | 3    | 3     | 3319.009 | 0.005       |
| 4    | 2      | 2      | 4     | 1       | 3       | 4    | 3     | 4288.234 | -0.007      |
| 4    | 2      | 2      | 4     | 1       | 3       | 4    | 5     | 4288.322 | -0.004      |
| 4    | 2      | 2      | 4     | 1       | 3       | 3    | 3     | 4288.627 | -0.010      |
| 4    | 2      | 2      | 4     | 1       | 3       | 5    | 5     | 4288.627 | -0.010      |
| 4    | 2      | 2      | 4     | 1       | 3       | 5    | 4     | 4288.968 | 0.001       |
| 4    | 2      | 2      | 4     | 1       | 3       | 3    | 4     | 4289.050 | 0.002       |
| 4    | 2      | 3      | 4     | 0       | 4       | 5    | 5     | 7192.528 | -0.008      |
| 4    | 2      | 3      | 4     | 1       | 4       | 4    | 4     | 6433.958 | 0.008       |
| 4    | 2      | 3      | 4     | 1       | 4       | 5    | 5     | 6435.441 | 0.007       |
| 4    | 2      | 3      | 4     | 1       | 4       | 3    | 3     | 6435.822 | 0.006       |
| 5    | 0      | 5      | 4     | 0       | 4       | 6    | 5     | 7752.210 | -0.002      |
| 5    | 0      | 5      | 4     | 0       | 4       | 4    | 3     | 7752.210 | -0.002      |
| 5    | 0      | 5      | 4     | 0       | 4       | 5    | 4     | 7752.478 | -0.003      |
| 5    | 1      | 5      | 4     | 1       | 4       | 6    | 5     | 7496.741 | 0.000       |
| 5    | 1      | 5      | 4     | 1       | 4       | 4    | 3     | 7496.809 | -0.001      |
| 5    | 1      | 5      | 4     | 1       | 4       | 5    | 4     | 7496.876 | -0.002      |
| 5    | 0      | 5      | 4     | 1       | 4       | 5    | 4     | 6994.935 | 0.003       |
| 5    | 0      | 5      | 4     | 1       | 4       | 6    | 5     | 6995.104 | 0.003       |
| 5    | 0      | 5      | 4     | 1       | 4       | 4    | 3     | 6995.235 | 0.002       |
| 5    | 1      | 4      | 4     | 2       | 3       | 5    | 4     | 4867.509 | 0.002       |
| 5    | 1      | 4      | 4     | 2       | 3       | 6    | 5     | 4868.007 | 0.005       |
| 5    | 1      | 4      | 4     | 2       | 3       | 4    | 3     | 4868.122 | 0.002       |
| 5    | 1      | 4      | 5     | 0       | 5       | 5    | 5     | 4306.522 | -0.003      |
| 5    | 1      | 4      | 5     | 0       | 5       | 6    | 6     | 4308.334 | -0.001      |
| 5    | 1      | 4      | 5     | 0       | 5       | 4    | 4     | 4308.700 | -0.003      |
| 5    | 1      | 5      | 4     | 0       | 4       | 5    | 4     | 8254.408 | -0.019      |
| 5    | 1      | 5      | 4     | 0       | 4       | 6    | 5     | 8253.820 | -0.001      |
| 5    | 1      | 5      | 4     | 0       | 4       | 4    | 3     | 8253.820 | -0.001      |
| 5    | 2      | 4      | 5     | 1       | 5       | 5    | 5     | 7120.864 | 0.007       |
| 5    | 2      | 4      | 5     | 1       | 5       | 6    | 6     | 7122.275 | 0.007       |
| 5    | 2      | 4      | 5     | 1       | 5       | 4    | 4     | 7122.565 | 0.010       |
| 5    | 2      | 3      | 5     | 1       | 4       | 5    | 5     | 4225.160 | -0.003      |
| 5    | 2      | 3      | 5     | 1       | 4       | 6    | 6     | 4225.371 | -0.009      |
| 5    | 2      | 3      | 5     | 1       | 4       | 4    | 4     | 4225.371 | -0.009      |
| 5    | 3      | 2      | 5     | 2       | 3       | 5    | 5     | 7885.373 | 0.004       |
| 5    | 3      | 2      | 5     | 2       | 3       | 6    | 6     | 7885.183 | 0.011       |
| 6    | 1      | 5      | 6     | 0       | 6       | 6    | 6     | 5551.151 | -0.010      |
| 6    | 1      | 5      | 6     | 0       | 6       | 7    | 7     | 5553.001 | -0.015      |
| 6    | 1      | 5      | 6     | 0       | 6       | 5    | 5     | 5553.318 | -0.011      |
| 6    | 1      | 5      | 5     | 2       | 4       | 6    | 5     | 7062.982 | 0.009       |
| 6    | 1      | 5      | 5     | 2       | 4       | 7    | 6     | 7063.496 | 0.009       |
| 6    | 1      | 5      | 5     | 2       | 4       | 5    | 4     | 7063.613 | 0.020       |
| 6    | 2      | 4      | 6     | 1       | 5       | 7    | 7     | 4373.505 | -0.002      |
| 6    | 2      | 4      | 6     | 1       | 5       | 5    | 5     | 4373.584 | 0.001       |

*Continued on next page*

Table S3 – *continued from previous page*

| $J'$ | $K'_a$ | $K'_c$ | $J''$ | $K''_a$ | $K''_c$ | $F'$ | $F''$ | $\nu$     | $\Delta\nu$ |
|------|--------|--------|-------|---------|---------|------|-------|-----------|-------------|
| 6    | 2      | 4      | 6     | 1       | 5       | 6    | 6     | 4373.056  | -0.005      |
| 6    | 3      | 3      | 6     | 2       | 4       | 5    | 5     | 7474.031  | 0.035       |
| 6    | 3      | 3      | 6     | 2       | 4       | 7    | 7     | 7474.031  | -0.019      |
| 6    | 3      | 3      | 6     | 2       | 4       | 6    | 6     | 7474.372  | 0.000       |
| 7    | 1      | 6      | 7     | 0       | 7       | 7    | 7     | 6993.604  | -0.008      |
| 7    | 1      | 6      | 7     | 0       | 7       | 8    | 8     | 6995.426  | 0.002       |
| 7    | 1      | 6      | 7     | 0       | 7       | 7    | 8     | 6995.693  | 0.017       |
| 7    | 2      | 5      | 7     | 1       | 6       | 7    | 7     | 4787.097  | -0.002      |
| 7    | 2      | 5      | 7     | 1       | 6       | 8    | 8     | 4787.794  | 0.002       |
| 7    | 2      | 5      | 7     | 1       | 6       | 6    | 6     | 4787.891  | -0.001      |
| 7    | 3      | 4      | 7     | 2       | 5       | 8    | 8     | 7027.686  | 0.001       |
| 7    | 3      | 4      | 7     | 2       | 5       | 7    | 7     | 7027.990  | -0.005      |
| 8    | 2      | 6      | 8     | 1       | 7       | 8    | 8     | 5505.108  | -0.009      |
| 8    | 2      | 6      | 8     | 1       | 7       | 9    | 9     | 5506.025  | -0.011      |
| 8    | 2      | 6      | 8     | 1       | 7       | 7    | 7     | 5506.146  | -0.006      |
| 13   | 12     | 1      | 12    | 11      | 2       | 13   | 12    | 60560.640 | -0.064      |
| 13   | 12     | 2      | 12    | 11      | 1       | 13   | 12    | 60560.640 | -0.064      |
| 14   | 12     | 2      | 13    | 11      | 3       | 14   | 13    | 62219.620 | 0.113       |
| 14   | 12     | 3      | 13    | 11      | 2       | 14   | 13    | 62219.620 | 0.113       |
| 15   | 11     | 4      | 14    | 10      | 5       | 15   | 14    | 60484.080 | -0.016      |
| 15   | 11     | 5      | 14    | 10      | 4       | 15   | 14    | 60484.080 | -0.016      |
| 16   | 11     | 5      | 15    | 10      | 6       | 16   | 15    | 62138.670 | -0.074      |
| 16   | 11     | 6      | 15    | 10      | 5       | 16   | 15    | 62138.670 | -0.074      |
| 17   | 10     | 7      | 16    | 9       | 8       | 17   | 16    | 60383.350 | 0.015       |
| 17   | 10     | 8      | 16    | 9       | 7       | 17   | 16    | 60383.350 | 0.031       |

Table S4: Experimental rotational transition frequencies of  $^{13}\text{C1-4AA}$ 

| $J'$ | $K'_a$ | $K'_c$ | $J''$ | $K''_a$ | $K''_c$ | $F'$ | $F''$ | $\nu_{obs}/\text{MHz}$ | $\Delta\nu_{obs-calc}$ |
|------|--------|--------|-------|---------|---------|------|-------|------------------------|------------------------|
| 3    | 0      | 3      | 2     | 0       | 2       | 4    | 3     | 4310.524               | 0.004                  |
| 3    | 1      | 2      | 2     | 1       | 1       | 4    | 3     | 4532.792               | -0.009                 |
| 4    | 0      | 4      | 3     | 0       | 3       | 5    | 4     | 5725.150               | 0.007                  |
| 4    | 0      | 4      | 3     | 0       | 3       | 4    | 3     | 5725.263               | 0.004                  |
| 4    | 1      | 3      | 3     | 1       | 2       | 5    | 4     | 6037.869               | -0.002                 |
| 4    | 1      | 3      | 3     | 1       | 2       | 3    | 2     | 6037.809               | 0.001                  |
| 4    | 1      | 3      | 3     | 1       | 2       | 4    | 3     | 6037.967               | -0.002                 |
| 4    | 1      | 4      | 3     | 1       | 3       | 5    | 4     | 5488.966               | -0.002                 |
| 5    | 0      | 5      | 4     | 0       | 4       | 6    | 5     | 7121.516               | -0.012                 |
| 5    | 0      | 5      | 4     | 0       | 4       | 5    | 4     | 7121.665               | 0.004                  |
| 5    | 1      | 4      | 4     | 1       | 3       | 6    | 5     | 7537.603               | 0.006                  |
| 5    | 1      | 4      | 4     | 1       | 3       | 5    | 4     | 7537.603               | 0.006                  |
| 5    | 1      | 5      | 4     | 1       | 4       | 6    | 5     | 6852.887               | -0.001                 |

Table S5: Experimental rotational transition frequencies of  $^{13}\text{C2-4AA}$ 

| $J'$ | $K'_a$ | $K'_c$ | $J''$ | $K''_a$ | $K''_c$ | $F'$ | $F''$ | $\nu_{obs}/\text{MHz}$ | $\Delta\nu_{obs-calc}$ |
|------|--------|--------|-------|---------|---------|------|-------|------------------------|------------------------|
| 3    | 0      | 3      | 2     | 0       | 2       | 4    | 3     | 4308.816               | 0.001                  |
| 3    | 1      | 2      | 2     | 1       | 1       | 4    | 3     | 4533.744               | 0.003                  |
| 4    | 0      | 4      | 3     | 0       | 3       | 5    | 4     | 5722.134               | 0.001                  |
| 4    | 0      | 4      | 3     | 0       | 3       | 4    | 3     | 5722.254               | 0.003                  |
| 4    | 1      | 3      | 3     | 1       | 2       | 3    | 2     | 6038.852               | -0.004                 |
| 4    | 1      | 3      | 3     | 1       | 2       | 5    | 4     | 6038.918               | -0.001                 |
| 4    | 1      | 3      | 3     | 1       | 2       | 4    | 3     | 6039.024               | 0.007                  |
| 4    | 1      | 4      | 3     | 1       | 3       | 5    | 4     | 5484.457               | 0.003                  |
| 5    | 0      | 5      | 4     | 0       | 4       | 6    | 5     | 7116.645               | -0.003                 |
| 5    | 0      | 5      | 4     | 0       | 4       | 5    | 4     | 7116.786               | 0.003                  |
| 5    | 1      | 4      | 4     | 1       | 3       | 6    | 5     | 7538.553               | -0.005                 |
| 5    | 1      | 4      | 4     | 1       | 3       | 5    | 4     | 7538.553               | -0.005                 |
| 5    | 1      | 5      | 4     | 1       | 4       | 6    | 5     | 6846.975               | -0.004                 |

Table S6: Experimental rotational transition frequencies of  $^{13}\text{C3-4AA}$ 

| $J'$ | $K'_a$ | $K'_c$ | $J''$ | $K''_a$ | $K''_c$ | $F'$ | $F''$ | $\nu_{obs}/\text{MHz}$ | $\Delta\nu_{obs-calc}$ |
|------|--------|--------|-------|---------|---------|------|-------|------------------------|------------------------|
| 3    | 0      | 3      | 2     | 0       | 2       | 4    | 3     | 4296.036               | -0.002                 |
| 3    | 1      | 3      | 2     | 1       | 2       | 4    | 3     | 4105.762               | -0.003                 |
| 4    | 0      | 4      | 3     | 0       | 3       | 5    | 4     | 5705.409               | 0.003                  |
| 4    | 0      | 4      | 3     | 0       | 3       | 4    | 3     | 5705.525               | 0.002                  |
| 4    | 1      | 3      | 3     | 1       | 2       | 3    | 2     | 6019.858               | 0.002                  |
| 4    | 1      | 3      | 3     | 1       | 2       | 5    | 4     | 6019.924               | 0.005                  |
| 4    | 1      | 3      | 3     | 1       | 2       | 4    | 3     | 6020.010               | -0.007                 |
| 4    | 1      | 4      | 3     | 1       | 3       | 5    | 4     | 5468.927               | -0.007                 |
| 5    | 0      | 5      | 4     | 0       | 4       | 6    | 5     | 7096.199               | -0.010                 |
| 5    | 0      | 5      | 4     | 0       | 4       | 5    | 4     | 7096.351               | 0.007                  |
| 5    | 1      | 4      | 4     | 1       | 3       | 6    | 5     | 7514.950               | -0.001                 |
| 5    | 1      | 4      | 4     | 1       | 3       | 5    | 4     | 7514.950               | -0.001                 |
| 5    | 1      | 5      | 4     | 1       | 4       | 6    | 5     | 6827.691               | 0.000                  |
| 5    | 1      | 5      | 4     | 1       | 4       | 5    | 4     | 6827.795               | 0.007                  |

Table S7: Experimental rotational transition frequencies of  $^{13}\text{C4-4AA}$ 

| $J'$ | $K'_a$ | $K'_c$ | $J''$ | $K''_a$ | $K''_c$ | $F'$ | $F''$ | $\nu_{obs}/\text{MHz}$ | $\Delta\nu_{obs-calc}$ |
|------|--------|--------|-------|---------|---------|------|-------|------------------------|------------------------|
| 3    | 0      | 3      | 2     | 0       | 2       | 4    | 3     | 4285.017               | -0.002                 |
| 3    | 1      | 2      | 2     | 1       | 1       | 4    | 3     | 4504.443               | 0.002                  |
| 3    | 1      | 3      | 2     | 1       | 2       | 4    | 3     | 4097.274               | 0.000                  |
| 3    | 1      | 3      | 2     | 1       | 2       | 3    | 2     | 4097.542               | 0.001                  |
| 4    | 0      | 4      | 3     | 0       | 3       | 5    | 4     | 5691.680               | -0.001                 |
| 4    | 1      | 3      | 3     | 1       | 2       | 3    | 2     | 6000.143               | 0.000                  |
| 4    | 1      | 3      | 3     | 1       | 2       | 5    | 4     | 6000.203               | -0.003                 |
| 4    | 1      | 3      | 3     | 1       | 2       | 4    | 3     | 6000.305               | 0.001                  |
| 4    | 1      | 4      | 3     | 1       | 3       | 5    | 4     | 5457.846               | 0.002                  |
| 5    | 0      | 5      | 4     | 0       | 4       | 6    | 5     | 7080.529               | 0.001                  |
| 5    | 1      | 4      | 4     | 1       | 3       | 6    | 5     | 7490.766               | 0.001                  |
| 5    | 1      | 4      | 4     | 1       | 3       | 5    | 4     | 7490.766               | 0.001                  |
| 5    | 1      | 5      | 4     | 1       | 4       | 6    | 5     | 6814.178               | -0.002                 |

Table S8: Experimental rotational transition frequencies of  $^{13}\text{C5-4AA}$ 

| $J'$ | $K'_a$ | $K'_c$ | $J''$ | $K''_a$ | $K''_c$ | $F'$ | $F''$ | $\nu_{obs}/\text{MHz}$ | $\Delta\nu_{obs-calc}$ |
|------|--------|--------|-------|---------|---------|------|-------|------------------------|------------------------|
| 3    | 0      | 3      | 2     | 0       | 2       | 4    | 3     | 4296.408               | -0.001                 |
| 3    | 1      | 2      | 2     | 1       | 1       | 4    | 3     | 4519.968               | 0.001                  |
| 3    | 1      | 2      | 2     | 1       | 1       | 3    | 2     | 4520.158               | -0.004                 |
| 3    | 1      | 3      | 2     | 1       | 2       | 4    | 3     | 4106.029               | 0.000                  |
| 4    | 0      | 4      | 3     | 0       | 3       | 5    | 4     | 5705.863               | 0.006                  |
| 4    | 0      | 4      | 3     | 0       | 3       | 4    | 3     | 5705.979               | 0.005                  |
| 4    | 1      | 3      | 3     | 1       | 2       | 3    | 2     | 6020.568               | 0.005                  |
| 4    | 1      | 3      | 3     | 1       | 2       | 5    | 4     | 6020.624               | -0.002                 |
| 4    | 1      | 3      | 3     | 1       | 2       | 4    | 3     | 6020.721               | -0.003                 |
| 4    | 1      | 4      | 3     | 1       | 3       | 5    | 4     | 5469.279               | 0.003                  |
| 5    | 0      | 5      | 4     | 0       | 4       | 6    | 5     | 7096.697               | -0.011                 |
| 5    | 0      | 5      | 4     | 0       | 4       | 5    | 4     | 7096.849               | 0.006                  |
| 5    | 1      | 4      | 4     | 1       | 3       | 6    | 5     | 7515.816               | 0.001                  |
| 5    | 1      | 4      | 4     | 1       | 3       | 5    | 4     | 7515.816               | 0.001                  |
| 5    | 1      | 5      | 4     | 1       | 4       | 6    | 5     | 6828.099               | -0.004                 |
| 5    | 1      | 5      | 4     | 1       | 4       | 5    | 4     | 6828.200               | 0.000                  |

Table S9: Experimental rotational transition frequencies of  $^{13}\text{C6-4AA}$ 

| $J'$ | $K'_a$ | $K'_c$ | $J''$ | $K''_a$ | $K''_c$ | $F'$ | $F''$ | $\nu_{obs}/\text{MHz}$ | $\Delta\nu_{obs-calc}$ |
|------|--------|--------|-------|---------|---------|------|-------|------------------------|------------------------|
| 3    | 0      | 3      | 2     | 0       | 2       | 4    | 3     | 4308.951               | 0.004                  |
| 3    | 1      | 2      | 2     | 1       | 1       | 4    | 3     | 4533.816               | -0.007                 |
| 4    | 0      | 4      | 3     | 0       | 3       | 5    | 4     | 5722.332               | 0.008                  |
| 4    | 0      | 4      | 3     | 0       | 3       | 4    | 3     | 5722.441               | -0.002                 |
| 4    | 1      | 3      | 3     | 1       | 2       | 5    | 4     | 6039.024               | -0.009                 |
| 4    | 1      | 3      | 3     | 1       | 2       | 4    | 3     | 6039.132               | 0.001                  |
| 4    | 1      | 4      | 3     | 1       | 3       | 5    | 4     | 5484.671               | 0.000                  |
| 5    | 0      | 5      | 4     | 0       | 4       | 6    | 5     | 7116.904               | -0.005                 |
| 5    | 0      | 5      | 4     | 0       | 4       | 5    | 4     | 7117.045               | 0.000                  |
| 5    | 1      | 4      | 4     | 1       | 3       | 6    | 5     | 7538.718               | 0.010                  |
| 5    | 1      | 4      | 4     | 1       | 3       | 5    | 4     | 7538.718               | 0.010                  |
| 5    | 1      | 5      | 4     | 1       | 4       | 6    | 5     | 6847.255               | -0.001                 |

Table S10: Experimental rotational transition frequencies of  $^{13}\text{C7-4AA}$ 

| $J'$ | $K'_a$ | $K'_c$ | $J''$ | $K''_a$ | $K''_c$ | $F'$ | $F''$ | $\nu_{obs}/\text{MHz}$ | $\Delta\nu_{obs-calc}$ |
|------|--------|--------|-------|---------|---------|------|-------|------------------------|------------------------|
| 3    | 0      | 3      | 2     | 0       | 2       | 4    | 3     | 4285.057               | 0.009                  |
| 3    | 1      | 2      | 2     | 1       | 1       | 4    | 3     | 4504.510               | -0.006                 |
| 3    | 1      | 3      | 2     | 1       | 2       | 4    | 3     | 4097.227               | -0.006                 |
| 3    | 1      | 3      | 2     | 1       | 2       | 3    | 2     | 4097.498               | -0.003                 |
| 4    | 0      | 4      | 3     | 0       | 3       | 4    | 3     | 5691.855               | 0.004                  |
| 4    | 1      | 3      | 3     | 1       | 2       | 3    | 2     | 6000.254               | 0.007                  |
| 4    | 1      | 3      | 3     | 1       | 2       | 5    | 4     | 6000.305               | -0.005                 |
| 4    | 1      | 3      | 3     | 1       | 2       | 4    | 3     | 6000.400               | -0.007                 |
| 4    | 1      | 4      | 3     | 1       | 3       | 5    | 4     | 5457.790               | -0.004                 |
| 5    | 0      | 5      | 4     | 0       | 4       | 5    | 4     | 7080.746               | -0.006                 |
| 5    | 1      | 4      | 4     | 1       | 3       | 6    | 5     | 7490.909               | 0.006                  |
| 5    | 1      | 4      | 4     | 1       | 3       | 5    | 4     | 7490.909               | 0.006                  |
| 5    | 1      | 5      | 4     | 1       | 4       | 6    | 5     | 6814.130               | 0.007                  |

Table S11: Experimental rotational transition frequencies of  $^{13}\text{C8-4AA}$ 

| $J'$ | $K'_a$ | $K'_c$ | $J''$ | $K''_a$ | $K''_c$ | $F'$ | $F''$ | $\nu_{obs}/\text{MHz}$ | $\Delta\nu_{obs-calc}$ |
|------|--------|--------|-------|---------|---------|------|-------|------------------------|------------------------|
| 3    | 0      | 3      | 2     | 0       | 2       | 4    | 3     | 4256.445               | 0.004                  |
| 3    | 1      | 2      | 2     | 1       | 1       | 4    | 3     | 4475.343               | 0.006                  |
| 3    | 1      | 2      | 2     | 1       | 1       | 3    | 2     | 4475.530               | -0.002                 |
| 3    | 1      | 3      | 2     | 1       | 2       | 4    | 3     | 4069.365               | 0.009                  |
| 3    | 1      | 3      | 2     | 1       | 2       | 3    | 2     | 4069.627               | 0.003                  |
| 4    | 0      | 4      | 3     | 0       | 3       | 5    | 4     | 5653.487               | -0.001                 |
| 4    | 0      | 4      | 3     | 0       | 3       | 4    | 3     | 5653.613               | 0.010                  |
| 4    | 1      | 3      | 3     | 1       | 2       | 5    | 4     | 5961.372               | -0.002                 |
| 4    | 1      | 3      | 3     | 1       | 2       | 3    | 2     | 5961.314               | 0.002                  |
| 4    | 1      | 3      | 3     | 1       | 2       | 4    | 3     | 5961.465               | -0.007                 |
| 4    | 1      | 4      | 3     | 1       | 3       | 5    | 4     | 5420.607               | 0.007                  |
| 5    | 0      | 5      | 4     | 0       | 4       | 6    | 5     | 7032.648               | -0.010                 |
| 5    | 0      | 5      | 4     | 0       | 4       | 5    | 4     | 7032.798               | 0.008                  |
| 5    | 1      | 5      | 4     | 1       | 4       | 6    | 5     | 6767.598               | 0.003                  |
| 5    | 1      | 5      | 4     | 1       | 4       | 5    | 4     | 6767.673               | -0.019                 |

Table S12: Experimental rotational transition frequencies of  $^{15}\text{N-4AA}$ 

| $J'$ | $K'_a$ | $K'_c$ | $J''$ | $K''_a$ | $K''_c$ | $\nu_{obs}/\text{MHz}$ | $\Delta\nu_{obs-calc}$ |
|------|--------|--------|-------|---------|---------|------------------------|------------------------|
| 3    | 0      | 3      | 2     | 0       | 2       | 4238.414               | -0.004                 |
| 3    | 1      | 2      | 2     | 1       | 1       | 4452.696               | 0.004                  |
| 4    | 0      | 4      | 3     | 0       | 3       | 5630.510               | -0.003                 |
| 4    | 1      | 4      | 3     | 1       | 3       | 5400.849               | -0.003                 |
| 4    | 1      | 3      | 3     | 1       | 2       | 5931.450               | -0.004                 |
| 5    | 0      | 5      | 4     | 0       | 4       | 7005.571               | 0.002                  |
| 5    | 1      | 5      | 4     | 1       | 4       | 6743.268               | 0.004                  |
| 5    | 1      | 4      | 4     | 1       | 3       | 7405.239               | 0.002                  |



Table S13: Experimental rotational transition frequencies of  $^{13}\text{C1-3AA-Z}$ .

| $J'$ | $K'_a$ | $K'_c$ | $J''$ | $K''_a$ | $K''_c$ | $F'$ | $F''$ | $\nu_{obs}/\text{MHz}$ | $\Delta\nu_{obs-calc}$ |
|------|--------|--------|-------|---------|---------|------|-------|------------------------|------------------------|
| 3    | 0      | 3      | 2     | 0       | 2       | 4    | 3     | 4808.965               | 0.001                  |
| 3    | 0      | 3      | 2     | 0       | 2       | 2    | 1     | 4809.050               | -0.002                 |
| 3    | 0      | 3      | 2     | 0       | 2       | 3    | 2     | 4809.195               | -0.002                 |
| 3    | 1      | 3      | 2     | 1       | 2       | 3    | 2     | 4524.826               | -0.004                 |
| 4    | 1      | 4      | 3     | 1       | 3       | 5    | 4     | 6006.971               | -0.002                 |
| 4    | 1      | 4      | 3     | 1       | 3       | 3    | 2     | 6007.076               | -0.005                 |
| 4    | 1      | 4      | 3     | 1       | 3       | 4    | 3     | 6007.146               | 0.005                  |
| 3    | 1      | 2      | 2     | 1       | 1       | 2    | 1     | 5259.574               | 0.001                  |
| 3    | 1      | 2      | 2     | 1       | 1       | 4    | 3     | 5259.786               | 0.001                  |
| 4    | 0      | 4      | 3     | 0       | 3       | 5    | 4     | 6306.647               | -0.010                 |
| 4    | 0      | 4      | 3     | 0       | 3       | 4    | 3     | 6306.923               | -0.003                 |
| 2    | 0      | 2      | 1     | 0       | 1       | 3    | 2     | 3246.785               | 0.003                  |
| 4    | 1      | 3      | 3     | 1       | 2       | 5    | 4     | 6979.709               | 0.004                  |
| 5    | 1      | 5      | 4     | 1       | 4       | 6    | 5     | 7471.547               | 0.010                  |
| 5    | 1      | 5      | 4     | 1       | 4       | 5    | 4     | 7471.676               | 0.006                  |
| 2    | 1      | 2      | 1     | 0       | 1       | 3    | 2     | 4693.602               | -0.003                 |
| 4    | 0      | 4      | 3     | 1       | 3       | 5    | 4     | 5144.241               | 0.003                  |
| 4    | 0      | 4      | 3     | 1       | 3       | 4    | 3     | 5143.911               | -0.005                 |
| 4    | 0      | 4      | 3     | 1       | 3       | 3    | 2     | 5144.471               | -0.002                 |

Table S14: Experimental rotational transition frequencies of  $^{13}\text{C2-3AA-Z}$ .

| $J'$ | $K'_a$ | $K'_c$ | $J''$ | $K''_a$ | $K''_c$ | $F'$ | $F''$ | $\nu_{obs}/\text{MHz}$ | $\Delta\nu_{obs-calc}$ |
|------|--------|--------|-------|---------|---------|------|-------|------------------------|------------------------|
| 3    | 0      | 3      | 2     | 0       | 2       | 4    | 3     | 4806.606               | -0.003                 |
| 3    | 0      | 3      | 2     | 0       | 2       | 2    | 1     | 4806.698               | 0.001                  |
| 3    | 0      | 3      | 2     | 0       | 2       | 3    | 2     | 4806.843               | 0.000                  |
| 3    | 1      | 3      | 2     | 1       | 2       | 4    | 3     | 4522.015               | -0.002                 |
| 3    | 1      | 3      | 2     | 1       | 2       | 3    | 2     | 4522.291               | 0.003                  |
| 4    | 1      | 4      | 3     | 1       | 3       | 5    | 4     | 6003.325               | -0.003                 |
| 4    | 1      | 4      | 3     | 1       | 3       | 4    | 3     | 6003.500               | 0.003                  |
| 3    | 1      | 2      | 2     | 1       | 1       | 2    | 1     | 5259.162               | 0.002                  |
| 3    | 1      | 2      | 2     | 1       | 1       | 3    | 2     | 5259.574               | 0.001                  |
| 3    | 1      | 2      | 2     | 1       | 1       | 4    | 3     | 5259.372               | 0.000                  |
| 4    | 0      | 4      | 3     | 0       | 3       | 5    | 4     | 6302.538               | -0.006                 |
| 4    | 0      | 4      | 3     | 0       | 3       | 4    | 3     | 6302.817               | 0.002                  |
| 2    | 0      | 2      | 1     | 0       | 1       | 3    | 2     | 3245.635               | -0.003                 |
| 4    | 1      | 3      | 3     | 1       | 2       | 5    | 4     | 6978.752               | -0.006                 |
| 5    | 1      | 5      | 4     | 1       | 4       | 5    | 4     | 7466.780               | -0.002                 |
| 2    | 1      | 2      | 1     | 0       | 1       | 3    | 2     | 4682.674               | 0.006                  |
| 4    | 0      | 4      | 3     | 1       | 3       | 5    | 4     | 5150.108               | 0.003                  |
| 4    | 0      | 4      | 3     | 1       | 3       | 4    | 3     | 5149.790               | 0.002                  |
| 4    | 0      | 4      | 3     | 1       | 3       | 3    | 2     | 5150.342               | 0.003                  |
| 3    | 1      | 3      | 2     | 0       | 2       | 4    | 3     | 5959.053               | 0.006                  |
| 3    | 1      | 3      | 2     | 0       | 2       | 3    | 2     | 5959.874               | 0.004                  |
| 3    | 1      | 3      | 2     | 0       | 2       | 2    | 1     | 5958.921               | -0.008                 |

Table S15: Experimental rotational transition frequencies of  $^{13}\text{C3-3AA-Z}$ .

| $J'$ | $K'_a$ | $K'_c$ | $J''$ | $K''_a$ | $K''_c$ | $F'$ | $F''$ | $\nu_{obs}/\text{MHz}$ | $\Delta\nu_{obs-calc}$ |
|------|--------|--------|-------|---------|---------|------|-------|------------------------|------------------------|
| 3    | 0      | 3      | 2     | 0       | 2       | 4    | 3     | 4786.224               | 0.000                  |
| 3    | 0      | 3      | 2     | 0       | 2       | 2    | 1     | 4786.308               | -0.004                 |
| 3    | 0      | 3      | 2     | 0       | 2       | 3    | 2     | 4786.453               | -0.002                 |
| 3    | 1      | 3      | 2     | 1       | 2       | 4    | 3     | 4503.553               | 0.002                  |
| 3    | 1      | 3      | 2     | 1       | 2       | 3    | 2     | 4503.818               | -0.003                 |
| 4    | 1      | 4      | 3     | 1       | 3       | 5    | 4     | 5979.403               | -0.003                 |
| 4    | 1      | 4      | 3     | 1       | 3       | 3    | 2     | 5979.518               | 0.004                  |
| 4    | 1      | 4      | 3     | 1       | 3       | 4    | 3     | 5979.566               | -0.007                 |
| 3    | 1      | 2      | 2     | 1       | 1       | 2    | 1     | 5232.100               | -0.001                 |
| 3    | 1      | 2      | 2     | 1       | 1       | 3    | 2     | 5232.519               | 0.006                  |
| 3    | 1      | 2      | 2     | 1       | 1       | 4    | 3     | 5232.307               | -0.007                 |
| 4    | 0      | 4      | 3     | 0       | 3       | 5    | 4     | 6278.065               | -0.003                 |
| 4    | 0      | 4      | 3     | 0       | 3       | 4    | 3     | 6278.327               | -0.009                 |
| 2    | 0      | 2      | 1     | 0       | 1       | 3    | 2     | 3230.890               | -0.001                 |
| 4    | 1      | 3      | 3     | 1       | 2       | 5    | 4     | 6943.738               | 0.008                  |
| 5    | 1      | 5      | 4     | 1       | 4       | 6    | 5     | 7437.682               | 0.004                  |
| 5    | 1      | 5      | 4     | 1       | 4       | 5    | 4     | 7437.812               | 0.002                  |
| 5    | 1      | 5      | 4     | 1       | 4       | 4    | 3     | 7437.756               | 0.008                  |
| 2    | 1      | 2      | 1     | 0       | 1       | 3    | 2     | 4682.118               | -0.008                 |
| 4    | 0      | 4      | 3     | 1       | 3       | 5    | 4     | 5109.508               | 0.002                  |
| 4    | 0      | 4      | 3     | 1       | 3       | 4    | 3     | 5109.171               | -0.009                 |
| 4    | 0      | 4      | 3     | 1       | 3       | 3    | 2     | 5109.747               | 0.005                  |
| 3    | 1      | 3      | 2     | 0       | 2       | 4    | 3     | 5954.794               | 0.008                  |

Table S16: Experimental rotational transition frequencies of  $^{13}\text{C4-3AA-Z}$ .

| $J'$ | $K'_a$ | $K'_c$ | $J''$ | $K''_a$ | $K''_c$ | $F'$ | $F''$ | $\nu_{obs}/\text{MHz}$ | $\Delta\nu_{obs-calc}$ |
|------|--------|--------|-------|---------|---------|------|-------|------------------------|------------------------|
| 3    | 0      | 3      | 2     | 0       | 2       | 4    | 3     | 4774.367               | 0.001                  |
| 3    | 0      | 3      | 2     | 0       | 2       | 2    | 1     | 4774.458               | 0.004                  |
| 3    | 0      | 3      | 2     | 0       | 2       | 3    | 2     | 4774.598               | 0.001                  |
| 3    | 1      | 3      | 2     | 1       | 2       | 4    | 3     | 4492.300               | 0.001                  |
| 3    | 1      | 3      | 2     | 1       | 2       | 3    | 2     | 4492.567               | -0.002                 |
| 3    | 1      | 3      | 2     | 1       | 2       | 2    | 1     | 4492.492               | 0.005                  |
| 4    | 1      | 4      | 3     | 1       | 3       | 5    | 4     | 5964.395               | -0.001                 |
| 4    | 1      | 4      | 3     | 1       | 3       | 3    | 2     | 5964.515               | 0.009                  |
| 4    | 1      | 4      | 3     | 1       | 3       | 4    | 3     | 5964.561               | -0.003                 |
| 3    | 1      | 2      | 2     | 1       | 1       | 2    | 1     | 5219.700               | -0.006                 |
| 3    | 1      | 2      | 2     | 1       | 1       | 3    | 2     | 5220.122               | 0.004                  |
| 3    | 1      | 2      | 2     | 1       | 1       | 4    | 3     | 5219.919               | 0.001                  |
| 4    | 0      | 4      | 3     | 0       | 3       | 5    | 4     | 6262.245               | -0.005                 |
| 4    | 0      | 4      | 3     | 0       | 3       | 4    | 3     | 6262.521               | 0.004                  |
| 2    | 0      | 2      | 1     | 0       | 1       | 3    | 2     | 3222.996               | -0.005                 |
| 4    | 1      | 3      | 3     | 1       | 2       | 5    | 4     | 6927.178               | 0.001                  |
| 5    | 1      | 5      | 4     | 1       | 4       | 6    | 5     | 7418.914               | -0.002                 |
| 5    | 1      | 5      | 4     | 1       | 4       | 5    | 4     | 7419.047               | -0.002                 |
| 5    | 1      | 5      | 4     | 1       | 4       | 4    | 3     | 7418.987               | 0.001                  |
| 2    | 1      | 2      | 1     | 0       | 1       | 3    | 2     | 4668.319               | 0.002                  |
| 4    | 0      | 4      | 3     | 1       | 3       | 5    | 4     | 5098.998               | -0.001                 |
| 4    | 0      | 4      | 3     | 1       | 3       | 4    | 3     | 5098.672               | -0.003                 |
| 3    | 1      | 3      | 2     | 0       | 2       | 4    | 3     | 5937.611               | -0.005                 |

Table S17: Experimental rotational transition frequencies of  $^{13}\text{C5-3AA-Z}$ .

| $J'$ | $K'_a$ | $K'_c$ | $J''$ | $K''_a$ | $K''_c$ | $F'$ | $F''$ | $\nu_{obs}/\text{MHz}$ | $\Delta\nu_{obs-calc}$ |
|------|--------|--------|-------|---------|---------|------|-------|------------------------|------------------------|
| 3    | 0      | 3      | 2     | 0       | 2       | 4    | 3     | 4786.946               | 0.002                  |
| 3    | 0      | 3      | 2     | 0       | 2       | 2    | 1     | 4787.033               | 0.002                  |
| 3    | 0      | 3      | 2     | 0       | 2       | 3    | 2     | 4787.185               | 0.002                  |
| 3    | 1      | 3      | 2     | 1       | 2       | 3    | 2     | 4502.740               | 0.002                  |
| 4    | 1      | 4      | 3     | 1       | 3       | 5    | 4     | 5976.455               | -0.002                 |
| 4    | 1      | 4      | 3     | 1       | 3       | 4    | 3     | 5976.625               | -0.003                 |
| 3    | 1      | 2      | 2     | 1       | 1       | 3    | 2     | 5245.363               | 0.000                  |
| 3    | 1      | 2      | 2     | 1       | 1       | 4    | 3     | 5245.162               | 0.001                  |
| 4    | 0      | 4      | 3     | 0       | 3       | 5    | 4     | 6273.298               | -0.006                 |
| 4    | 0      | 4      | 3     | 0       | 3       | 4    | 3     | 6273.572               | -0.007                 |
| 2    | 0      | 2      | 1     | 0       | 1       | 3    | 2     | 3233.875               | -0.004                 |
| 4    | 1      | 3      | 3     | 1       | 2       | 5    | 4     | 6958.535               | 0.000                  |
| 5    | 1      | 5      | 4     | 1       | 4       | 6    | 5     | 7432.024               | -0.001                 |
| 5    | 1      | 5      | 4     | 1       | 4       | 5    | 4     | 7432.168               | 0.008                  |
| 5    | 1      | 5      | 4     | 1       | 4       | 4    | 3     | 7432.090               | -0.005                 |
| 2    | 1      | 2      | 1     | 0       | 1       | 3    | 2     | 4635.141               | -0.009                 |
| 4    | 0      | 4      | 3     | 1       | 3       | 5    | 4     | 5156.518               | 0.008                  |
| 4    | 0      | 4      | 3     | 1       | 3       | 4    | 3     | 5156.208               | 0.003                  |
| 4    | 0      | 4      | 3     | 1       | 3       | 3    | 2     | 5156.736               | -0.006                 |
| 3    | 1      | 3      | 2     | 0       | 2       | 4    | 3     | 5903.736               | -0.001                 |
| 3    | 1      | 3      | 2     | 0       | 2       | 3    | 2     | 5904.564               | 0.007                  |
| 3    | 1      | 3      | 2     | 0       | 2       | 2    | 1     | 5903.628               | 0.008                  |

Table S18: Experimental rotational transition frequencies of  $^{13}\text{C6-3AA-Z}$ .

| $J'$ | $K'_a$ | $K'_c$ | $J''$ | $K''_a$ | $K''_c$ | $F'$ | $F''$ | $\nu_{obs}/\text{MHz}$ | $\Delta\nu_{obs-calc}$ |
|------|--------|--------|-------|---------|---------|------|-------|------------------------|------------------------|
| 3    | 0      | 3      | 2     | 0       | 2       | 4    | 3     | 4801.203               | 0.001                  |
| 3    | 0      | 3      | 2     | 0       | 2       | 2    | 1     | 4801.290               | 0.001                  |
| 3    | 0      | 3      | 2     | 0       | 2       | 3    | 2     | 4801.442               | 0.002                  |
| 3    | 1      | 3      | 2     | 1       | 2       | 4    | 3     | 4516.251               | 0.004                  |
| 3    | 1      | 3      | 2     | 1       | 2       | 3    | 2     | 4516.518               | 0.000                  |
| 3    | 1      | 3      | 2     | 1       | 2       | 2    | 1     | 4516.439               | 0.004                  |
| 4    | 1      | 4      | 3     | 1       | 3       | 5    | 4     | 5995.076               | -0.001                 |
| 4    | 1      | 4      | 3     | 1       | 3       | 3    | 2     | 5995.190               | 0.003                  |
| 4    | 1      | 4      | 3     | 1       | 3       | 4    | 3     | 5995.247               | 0.000                  |
| 3    | 1      | 2      | 2     | 1       | 1       | 2    | 1     | 5257.959               | 0.003                  |
| 3    | 1      | 2      | 2     | 1       | 1       | 3    | 2     | 5258.374               | 0.004                  |
| 3    | 1      | 2      | 2     | 1       | 1       | 4    | 3     | 5258.169               | 0.000                  |
| 4    | 0      | 4      | 3     | 0       | 3       | 5    | 4     | 6293.226               | 0.001                  |
| 4    | 0      | 4      | 3     | 0       | 3       | 4    | 3     | 6293.508               | 0.009                  |
| 2    | 0      | 2      | 1     | 0       | 1       | 3    | 2     | 3242.964               | -0.002                 |
| 4    | 1      | 3      | 3     | 1       | 2       | 5    | 4     | 6976.281               | -0.002                 |
| 5    | 1      | 5      | 4     | 1       | 4       | 6    | 5     | 7455.616               | 0.005                  |
| 5    | 1      | 5      | 4     | 1       | 4       | 5    | 4     | 7455.746               | 0.002                  |
| 5    | 1      | 5      | 4     | 1       | 4       | 4    | 3     | 7455.670               | -0.010                 |
| 2    | 1      | 2      | 1     | 0       | 1       | 3    | 2     | 4658.933               | -0.005                 |
| 4    | 0      | 4      | 3     | 1       | 3       | 5    | 4     | 5162.203               | -0.006                 |
| 4    | 0      | 4      | 3     | 1       | 3       | 4    | 3     | 5161.892               | -0.007                 |
| 3    | 1      | 3      | 2     | 0       | 2       | 4    | 3     | 5932.214               | -0.004                 |
| 3    | 1      | 3      | 2     | 0       | 2       | 3    | 2     | 5933.036               | -0.003                 |

Table S19: Experimental rotational transition frequencies of  $^{13}\text{C7-3AA-Z}$ .

| $J'$ | $K'_a$ | $K'_c$ | $J''$ | $K''_a$ | $K''_c$ | $F'$ | $F''$ | $\nu_{obs}/\text{MHz}$ | $\Delta\nu_{obs-calc}$ |
|------|--------|--------|-------|---------|---------|------|-------|------------------------|------------------------|
| 3    | 0      | 3      | 2     | 0       | 2       | 4    | 3     | 4782.138               | 0.001                  |
| 3    | 0      | 3      | 2     | 0       | 2       | 2    | 1     | 4782.226               | 0.000                  |
| 3    | 0      | 3      | 2     | 0       | 2       | 3    | 2     | 4782.368               | 0.000                  |
| 3    | 1      | 3      | 2     | 1       | 2       | 4    | 3     | 4499.835               | 0.005                  |
| 4    | 1      | 4      | 3     | 1       | 3       | 5    | 4     | 5974.566               | 0.000                  |
| 4    | 1      | 4      | 3     | 1       | 3       | 4    | 3     | 5974.729               | -0.004                 |
| 3    | 1      | 2      | 2     | 1       | 1       | 3    | 2     | 5227.233               | -0.001                 |
| 3    | 1      | 2      | 2     | 1       | 1       | 4    | 3     | 5227.027               | -0.007                 |
| 4    | 0      | 4      | 3     | 0       | 3       | 5    | 4     | 6273.094               | 0.002                  |
| 4    | 0      | 4      | 3     | 0       | 3       | 4    | 3     | 6273.365               | 0.005                  |
| 2    | 0      | 2      | 1     | 0       | 1       | 3    | 2     | 3227.973               | 0.009                  |
| 4    | 1      | 3      | 3     | 1       | 2       | 5    | 4     | 6936.870               | -0.002                 |
| 5    | 1      | 5      | 4     | 1       | 4       | 6    | 5     | 7431.771               | -0.020                 |
| 5    | 1      | 5      | 4     | 1       | 4       | 5    | 4     | 7431.929               | 0.006                  |
| 2    | 1      | 2      | 1     | 0       | 1       | 3    | 2     | 4681.498               | 0.000                  |
| 4    | 0      | 4      | 3     | 1       | 3       | 5    | 4     | 5101.876               | 0.009                  |
| 4    | 0      | 4      | 3     | 1       | 3       | 4    | 3     | 5101.540               | 0.000                  |
| 3    | 1      | 3      | 2     | 0       | 2       | 4    | 3     | 5953.365               | 0.001                  |
| 3    | 1      | 3      | 2     | 0       | 2       | 3    | 2     | 5954.186               | -0.001                 |
| 3    | 1      | 3      | 2     | 0       | 2       | 2    | 1     | 5953.251               | 0.007                  |

Table S20: Experimental rotational transition frequencies of  $^{13}\text{C8-3AA-Z}$ .

| $J'$ | $K'_a$ | $K'_c$ | $J''$ | $K''_a$ | $K''_c$ | $F'$ | $F''$ | $\nu_{obs}/\text{MHz}$ | $\Delta\nu_{obs-calc}$ |
|------|--------|--------|-------|---------|---------|------|-------|------------------------|------------------------|
| 3    | 0      | 3      | 2     | 0       | 2       | 4    | 3     | 4739.611               | -0.002                 |
| 3    | 0      | 3      | 2     | 0       | 2       | 2    | 1     | 4739.697               | -0.004                 |
| 3    | 0      | 3      | 2     | 0       | 2       | 3    | 2     | 4739.841               | 0.001                  |
| 3    | 1      | 3      | 2     | 1       | 2       | 4    | 3     | 4460.614               | 0.000                  |
| 3    | 1      | 3      | 2     | 1       | 2       | 3    | 2     | 4460.880               | -0.003                 |
| 4    | 1      | 4      | 3     | 1       | 3       | 3    | 2     | 5923.226               | -0.003                 |
| 4    | 1      | 4      | 3     | 1       | 3       | 4    | 3     | 5923.292               | 0.006                  |
| 4    | 1      | 4      | 3     | 1       | 3       | 5    | 4     | 5923.111               | -0.008                 |
| 3    | 1      | 2      | 2     | 1       | 1       | 2    | 1     | 5175.313               | -0.002                 |
| 3    | 1      | 2      | 2     | 1       | 1       | 3    | 2     | 5175.728               | 0.003                  |
| 3    | 1      | 2      | 2     | 1       | 1       | 4    | 3     | 5175.525               | -0.001                 |
| 4    | 0      | 4      | 3     | 0       | 3       | 5    | 4     | 6219.683               | -0.005                 |
| 4    | 0      | 4      | 3     | 0       | 3       | 4    | 3     | 6219.954               | 0.003                  |
| 2    | 0      | 2      | 1     | 0       | 1       | 3    | 2     | 3198.241               | 0.010                  |
| 5    | 1      | 5      | 4     | 1       | 4       | 6    | 5     | 7368.627               | 0.003                  |
| 5    | 1      | 5      | 4     | 1       | 4       | 5    | 4     | 7368.754               | -0.001                 |
| 5    | 1      | 5      | 4     | 1       | 4       | 4    | 3     | 7368.700               | 0.006                  |
| 2    | 1      | 2      | 1     | 0       | 1       | 3    | 2     | 4660.950               | 0.001                  |
| 4    | 0      | 4      | 3     | 1       | 3       | 5    | 4     | 5035.961               | -0.007                 |
| 4    | 0      | 4      | 3     | 1       | 3       | 4    | 3     | 5035.633               | 0.000                  |
| 4    | 0      | 4      | 3     | 1       | 3       | 3    | 2     | 5036.213               | 0.006                  |
| 3    | 1      | 3      | 2     | 0       | 2       | 3    | 2     | 5924.156               | -0.002                 |
